# Supplementary material for: Copper-catalyzed oxidative cyclization of arylamides and β-diketones: new synthesis of 2,4,5-trisubstituted oxazoles
Source: Royal Society of Chemistry journal article supplement (doi:10.1039/c4ra14394a), 2014-12-19

## Supporting information for

### Copper-Catalyzed Oxidative Cyclization of Arylamides and $\beta$ -Diketones: New Synthesis of 2,4,5-Trisubstituted Oxazoles

Yang Bai,<sup>a</sup> Wen Chen,<sup>a</sup> Ya Chen,<sup>a</sup> Huawen Huang,<sup>a</sup> Fuhong Xiao<sup>a</sup> and Guo-Jun Deng<sup>a\*</sup>

<sup>a</sup> Key Laboratory of Environmentally Friendly Chemistry and Application of Ministry of Education, College of Chemistry, Xiangtan University, Xiangtan 411105, China; Fax: (+86)-731-58292251; e-mail: gjdeng@xtu.edu.cn

#### Table of Contents

|                                                                              |              |
|------------------------------------------------------------------------------|--------------|
| <b>1. General information</b>                                                | <b>2</b>     |
| <b>2. General procedure for substrate preparation</b>                        | <b>2</b>     |
| <b>3. General procedure for oxidative cyclization</b>                        | <b>2</b>     |
| <b>4. Characterization data of products</b>                                  | <b>2-11</b>  |
| <b>5. References</b>                                                         | <b>11</b>    |
| <b>6. Copies of <sup>1</sup>H and <sup>13</sup>C NMR spectra of products</b> | <b>12-26</b> |

**General information:**

All experiments were carried out under an atmosphere of argon. Flash column chromatography was performed over silica gel 48-75  $\mu\text{m}$ .  $^1\text{H}$  NMR and  $^{13}\text{C}$  NMR spectra were recorded on Bruker-AV (400 and 100 MHz, respectively) instrument internally referenced to  $\text{SiMe}_4$  or chloroform signals. MS analyses were performed on an Agilent5975 GC-MS instrument (EI). The new compounds were characterized by  $^1\text{H}$  NMR,  $^{13}\text{C}$  NMR, MS and HRMS. Unless otherwise noted, all reagents were used as received from commercial sources without further purification. Copper salts and benzamide **1a**, **1b**, **1c**, **1d**, **1e**, **1f**, **1g**, **1h**, **1i**, **2a**, **2b** were purchased from Alfa-Aesar and were used as received without further purification, others were prepared according to the literature procedures.

**General Procedure for the preparation of  $\beta$ -diketo derivatives (2c-2j) <sup>[1]</sup>:**

Procedure for 1-phenylbutane-1,3-dione (**2c**): acetophenone (1166  $\mu\text{L}$ , 10 mmol) in dry ethyl acetate (10 mL) was added dropwise, at 0  $^\circ\text{C}$ , to a power of NaH (1.477g of a 65% power, 40 mmol) in dry ethyl acetate (10 mL) and the reaction mixture was stirred at 0  $^\circ\text{C}$  for 2 h and at 25  $^\circ\text{C}$  for further 12 h (TLC). 10% aqueous  $\text{NH}_4\text{Cl}$  was then carefully added (30 mL) and the mixture was acidified to pH 5 with HCl. The aqueous phase was separated and extracted with ethyl acetate (3  $\times$  15 mL). The combined organic phases were dried over anhydrous sodium sulfate and evaporated under reduced pressure; the crude product was purified by FC, with ethyl acetate/petroleum ether 9:1 as eluant, to give the diketone 1.225 g. Similarly, other diketo derivatives (**2c-2j**) were prepared from their corresponding ketone.

**General procedure for oxidative cyclization reaction (3a):**

A 10 mL reaction vessel was charged with CuBr (5.7 mg, 0.04 mmol), benzamide (**1a**, 48.4 mg, 0.4 mmol),  $\text{K}_2\text{S}_2\text{O}_8$  (108 mg, 2 equiv). The sealed reaction vessel was purged with argon three times. Pentane-2,4-dione (**2a**, 21  $\mu\text{L}$ , 0.2 mmol), acetic acid (23  $\mu\text{L}$ , 2 equiv) and 1,1,2,2-tetrachloroethane (0.4 mL) were added to the sealed reaction vessel by syringe. The resulting solution was stirred at 140  $^\circ\text{C}$  for 36 h. After cooling to room temperature, the volatiles were removed under vacuum and the residue was purified by column chromatography (silica gel, petroleum ether/ethyl acetate = 93:7) to give 33.5 mg **3a** as pale yellow solid; yield 83%.

### 1-(4-Methyl-2-phenyloxazol-5-yl)ethanone (**3a**)

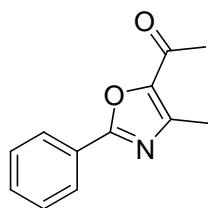

$^1\text{H}$  NMR (400 MHz,  $\text{CDCl}_3$ , ppm)  $\delta$  8.12 (d,  $J = 8.0$  Hz, 2H), 7.52-7.50 (m, 3H), 2.57 (s, 6H);  $^{13}\text{C}$  NMR (100 MHz,  $\text{CDCl}_3$ , ppm)  $\delta$  188.1, 162.0, 146.9, 145.8, 132.3, 129.6, 127.8, 127.1, 28.1, 14.4; MS (EI)  $m/z$  (%) 201, 186, 158, 130 (100), 77; HRMS calcd. for:  $\text{C}_{12}\text{H}_{11}\text{O}_2\text{NNa}$   $[\text{M}+\text{Na}]^+$  224.06820, found 224.06823.

### 1-(4-Methyl-2-p-tolyloxazol-5-yl)ethanone (**3b**)

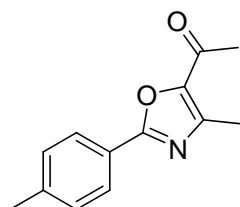

The reaction was conducted with 4-methylbenzamide (**1b**, 54.0 mg, 0.4 mmol) and pentane-2,4-dione (**2a**, 21  $\mu\text{L}$ , 0.2 mmol). The residue was purified by column chromatography (silica gel, petroleum ether/ethyl acetate = 93:7) to give **3b** as pale yellow solid; yield 81%.

$^1\text{H}$  NMR (400 MHz,  $\text{CDCl}_3$ , ppm)  $\delta$  8.00 (d,  $J = 8.0$  Hz, 2H), 7.30 (d,  $J = 8.0$  Hz, 2H), 2.56 (s, 3H), 2.55 (s, 3H), 2.43 (s, 3H);  $^{13}\text{C}$  NMR (100 MHz,  $\text{CDCl}_3$ , ppm)  $\delta$  187.4, 161.7, 146.3, 145.0, 142.2, 129.7, 127.2, 123.8, 27.4, 21.6, 13.8; MS (EI)  $m/z$  (%) 215, 172, 144 (100), 118, 77; HRMS calcd. for:  $\text{C}_{13}\text{H}_{14}\text{O}_2\text{N}$   $[\text{M}+\text{H}]^+$  216.10191, found 216.10184.

### 1-(2-(4-Methoxyphenyl)-4-methyloxazol-5-yl)ethanone (**3c**)

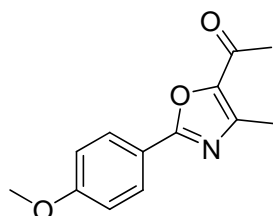

The reaction was conducted with 4-methoxybenzamide (**1c**, 60.4 mg, 0.4 mmol) and pentane-2,4-dione (**2a**, 21  $\mu\text{L}$ , 0.2 mmol). The residue was purified by column chromatography (silica gel, petroleum ether/ethyl acetate = 3:1) to give **3c** as pale yellow solid; yield 82%.

$^1\text{H}$  NMR (400 MHz,  $\text{CDCl}_3$ , ppm)  $\delta$  8.065 (d,  $J = 8.0$  Hz, 2H), 6.99 (d,  $J = 8.0$  Hz, 2H), 3.88 (s, 3H), 2.55 (s, 3H), 2.54 (s, 3H);  $^{13}\text{C}$  NMR (100 MHz,  $\text{CDCl}_3$ , ppm)  $\delta$  187.9, 163.1, 162.3, 147.1, 145.6, 129.7, 119.8, 115.1, 56.1, 28.0, 14.5; MS (EI)  $m/z$  (%) 231, 188, 160 (100), 119, 76; HRMS calcd. for:  $\text{C}_{13}\text{H}_{14}\text{O}_3\text{N}$   $[\text{M}+\text{H}]^+$  232.09682, found 232.09673.

### 1-(2-(4-Tert-butylphenyl)-4-methyloxazol-5-yl)ethanone (3d)

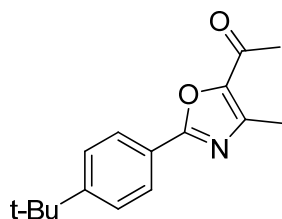

The reaction was conducted with 4-(*tert*-butyl)benzamide (**1d**, 70.8 mg, 0.4 mmol) and pentane-2,4-dione (**2a**, 21  $\mu\text{L}$ , 0.2 mmol). The residue was purified by column chromatography (silica gel, petroleum ether/ethyl acetate = 93:7) to give **3d** as pale yellow solid; yield 84%.

$^1\text{H}$  NMR (400 MHz,  $\text{CDCl}_3$ , ppm)  $\delta$  8.03 (d,  $J = 12.0$  Hz, 2H), 7.51 (d,  $J = 8.0$  Hz, 2H), 2.57 (s, 3H), 2.56 (s, 3H), 1.36 (s, 9H);  $^{13}\text{C}$  NMR (100 MHz,  $\text{CDCl}_3$ , ppm)  $\delta$  187.4, 161.7, 155.3, 146.4, 145.0, 127.1, 125.9, 123.7, 35.1, 31.1, 27.4, 13.8; MS (EI)  $m/z$  (%) 257, 242 (100), 186, 115, 77; HRMS calcd. for:  $\text{C}_{16}\text{H}_{20}\text{NO}_2$   $[\text{M}+\text{H}]^+$  258.14886, found 258.14874.

### 1-(2-(4-Fluorophenyl)-4-methyloxazol-5-yl)ethanone (3e)

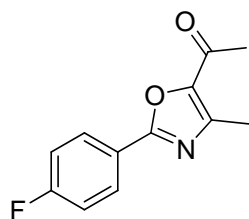

The reaction was conducted with 4-fluorobenzamide (**1e**, 55.6 mg, 0.4 mmol) and pentane-2,4-dione (**2a**, 21  $\mu\text{L}$ , 0.2 mmol). The residue was purified by column chromatography (silica gel, petroleum ether/ethyl acetate = 9:1) to give **3e** as yellow solid; yield 75%.

$^1\text{H}$  NMR (400 MHz,  $\text{CDCl}_3$ , ppm)  $\delta$  8.13-8.10 (m, 2H), 7.21-7.17 (m, 2H), 2.56 (m, 6H);  $^{13}\text{C}$  NMR (100 MHz,  $\text{CDCl}_3$ , ppm)  $\delta$  187.2, 164.8 (d,  $J = 251.2$  Hz), 160.5, 146.3, 145.2, 129.4 (d,  $J = 9.1$  Hz), 122.8 (d,  $J = 3.0$  Hz), 116.2 (d,  $J = 22.0$  Hz), 27.4, 13.7; MS (EI)  $m/z$  (%) 219, 176, 148 (100), 122, 75; HRMS calcd. for:  $\text{C}_{12}\text{H}_{11}\text{O}_2\text{NF}$   $[\text{M}+\text{H}]^+$  220.07683, found 220.07677.

### 1-(2-(4-Chlorophenyl)-4-methyloxazol-5-yl)ethanone (3f)

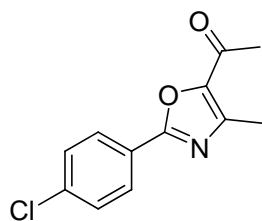

The reaction was conducted with 4-chlorobenzamide (**1f**, 62.0 mg, 0.4 mmol) and pentane-2,4-dione (**2a**, 21  $\mu$ L, 0.2 mmol). The residue was purified by column chromatography (silica gel, petroleum ether/ethyl acetate = 9:1) to give **3f** as pale yellow solid; yield 70%.

$^1\text{H}$  NMR (400 MHz,  $\text{CDCl}_3$ , ppm)  $\delta$  8.05 (d,  $J$  = 8.0 Hz, 2H), 7.48 (d,  $J$  = 8.0 Hz, 2H), 2.56 (s, 6H);  $^{13}\text{C}$  NMR (100 MHz,  $\text{CDCl}_3$ , ppm)  $\delta$  187.3, 160.4, 146.3, 145.3, 137.9, 129.3, 128.4, 125.0, 27.4, 13.7; MS (EI)  $m/z$  (%) 235, 192, 164 (100), 138, 75; HRMS calcd. for:  $\text{C}_{12}\text{H}_{11}\text{O}_2\text{NCl}$   $[\text{M}+\text{H}]^+$  236.04728, found 236.04720.

### 1-(2-(4-Bromophenyl)-4-methyloxazol-5-yl)ethanone (3g)

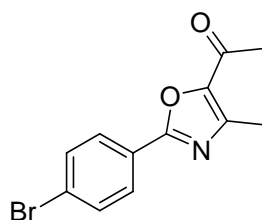

The reaction was conducted with 4-bromobenzamide (**1g**, 79.6 mg, 0.4 mmol) and pentane-2,4-dione (**2a**, 21  $\mu$ L, 0.2 mmol). The residue was purified by column chromatography (silica gel, petroleum ether/ethyl acetate = 9:1) to give **3g** as pale yellow solid; yield 68%.

$^1\text{H}$  NMR (400 MHz,  $\text{CDCl}_3$ , ppm)  $\delta$  7.98 (d,  $J$  = 8.0 Hz, 2H), 7.64 (d,  $J$  = 8.0 Hz, 2H), 2.56 (s, 6H);  $^{13}\text{C}$  NMR (100 MHz,  $\text{CDCl}_3$ , ppm)  $\delta$  187.9, 161.2, 147.0, 146.0, 133.0, 129.2, 127.0, 126.1, 28.1, 14.4; MS (EI)  $m/z$  (%) 279, 236, 208 (100), 182, 76; HRMS calcd. for:  $\text{C}_{12}\text{H}_{11}\text{O}_2\text{NBr}$   $[\text{M}+\text{H}]^+$  279.99677, found 279.99680.

### 1-(4-Methyl-2-(4-nitrophenyl)oxazol-5-yl)ethanone (3h)

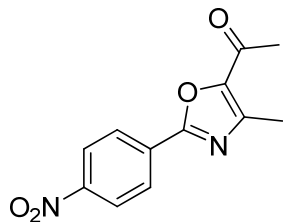

The reaction was conducted with 4-nitrobenzamide (**1h**, 66.4 mg, 0.4 mmol) and pentane-2,4-dione (**2a**, 21  $\mu$ L, 0.2 mmol). The residue was purified by column chromatography (silica gel, petroleum ether/ethyl acetate = 9:1) to give **3h** as pale yellow solid; yield 38%.

$^1\text{H}$  NMR (400 MHz,  $\text{CDCl}_3$ , ppm)  $\delta$  8.36 (d,  $J$  = 8.0 Hz, 2H), 8.29 (d,  $J$  = 8.0 Hz, 2H), 2.60 (s, 6H);  $^{13}\text{C}$  NMR (100 MHz,  $\text{CDCl}_3$ , ppm)  $\delta$  188.0, 159.6, 150.2, 147.2, 146.6, 132.5, 128.6, 124.9, 28.2, 14.4; MS (EI)  $m/z$  (%) 246, 203, 175 (100), 129, 76; HRMS calcd. for:  $\text{C}_{12}\text{H}_{11}\text{N}_2\text{O}_4$   $[\text{M}+\text{H}]^+$  247.07133, found 247.07163.

#### 1-(4-Methyl-2-m-tolyloxazol-5-yl)ethanone (**3i**)

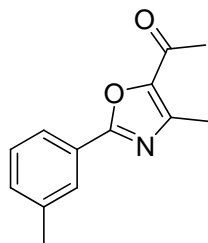

The reaction was conducted with 3-methylbenzamide (**1i**, 54.0 mg, 0.4 mmol) and pentane-2,4-dione (**2a**, 21  $\mu$ L, 0.2 mmol). The residue was purified by column chromatography (silica gel, petroleum ether/ethyl acetate = 95:5) to give **3i** as pale yellow solid; yield 80%.

$^1\text{H}$  NMR (400 MHz,  $\text{CDCl}_3$ , ppm)  $\delta$  7.94 (s, 1H), 7.90 (d,  $J$  = 4.0 Hz, 1H), 7.40–7.33 (m, 2H), 2.57 (s, 6H), 2.44 (s, 3H);  $^{13}\text{C}$  NMR (100 MHz,  $\text{CDCl}_3$ , ppm)  $\delta$  187.5, 161.6, 146.3, 145.0, 138.8, 132.5, 128.8, 127.7, 126.2, 124.3, 27.5, 21.3, 13.8; MS (EI)  $m/z$  (%) 215, 172, 144 (100), 118, 77; HRMS calcd. for:  $\text{C}_{13}\text{H}_{14}\text{O}_2\text{N}$   $[\text{M}+\text{H}]^+$  216.10191, found 216.10184.

#### (2,4-Diphenyloxazol-5-yl)(phenyl)methanone (**3j**)

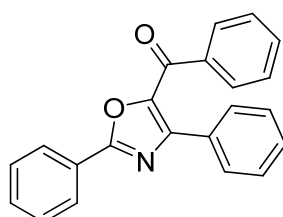

The reaction was conducted with benzamide (**1a**, 48.4 mg, 0.4 mmol) and 1,3-diphenylpropane-1,3-dione (**2b**, 44.8 mg, 0.2 mmol) for 48 h. The residue was purified by column chromatography (silica gel, petroleum ether/ethyl acetate = 93: 7) to give **3j** as pale yellow solid; yield 81%.

<sup>1</sup>H NMR (400 MHz, CDCl<sub>3</sub>, ppm) δ 8.19 (d, *J* = 4.0 Hz, 2H), 8.09 (d, *J* = 4.0 Hz, 2H), 7.96 (d, *J* = 8.0 Hz, 2H), 7.60-7.42 (m, 9H); <sup>13</sup>C NMR (100 MHz, CDCl<sub>3</sub>, ppm) δ 183.8, 162.6, 149.5, 144.3, 138.4, 133.5, 132.4, 131.4, 130.5, 130.3, 130.1, 129.7, 129.1, 128.9, 128.2, 127.1; MS (EI) *m/z* (%) 325 (100), 220, 192, 89, 77; HRMS calcd. for: C<sub>22</sub>H<sub>16</sub>O<sub>2</sub>N [M+H]<sup>+</sup> 326.11756, found 326.11722.

**(4-Methyl-2-phenyloxazol-5-yl)(phenyl)methanone (3k) and**

**1-(2,4-diphenyloxazol-5-yl)ethanone (3k')**

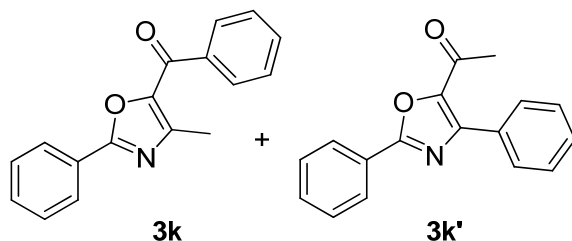

The reaction was conducted with benzamide (**1a**, 48.4 mg, 0.4 mmol), 1-phenylbutane-1,3-dione (**2c**, 32.4 mg, 0.2 mmol). The residue was purified by column chromatography (silica gel, petroleum ether/ethyl acetate = 93:7) to give **3k** and **3k'** as pale yellow solid; yield 82%. The ratio of the regioisomers was determined by GC (3:1).

<sup>1</sup>H NMR (400 MHz, CDCl<sub>3</sub>, ppm) δ 8.27–8.26 (m, 0.5H), 8.22-8.20 (m, 0.5H), 8.12-8.06 (m, 2.7H), 7.67-7.45 (m, 6.3H), 2.64-2.63 2s (2.64 s, (minor), 2.63 s, (major), 3H); MS (EI) *m/z* (%) 263, 246, 158, 130 (100), 77 (**3k**), 263, 248, 220, 192, 89 (100) (**3k'**); HRMS calcd. for: C<sub>17</sub>H<sub>14</sub>O<sub>2</sub>N [M+H]<sup>+</sup> 264.10191, found 264.10170.

**(4-Methyl-2-phenyloxazol-5-yl)(p-tolyl)methanone (3l) and**

**1-(2-phenyl-4-p-tolyloxazol-5-yl)ethanone (3l')**

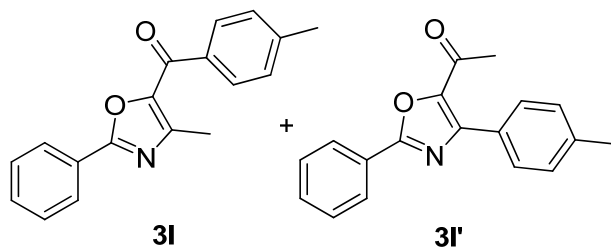

The reaction was conducted with benzamide (**1a**, 48.4 mg, 0.4 mmol), 1-(p-tolyl)butane-1,3-dione (**2d**, 35.2 mg, 0.2 mmol). The residue was purified by column chromatography (silica gel, petroleum ether/ethyl acetate = 93:7) to give **3I** and **3I'** as pale yellow solid; yield 81%. The ratio of the regioisomers was determined by GC (4:1).

$^1\text{H}$  NMR (400 MHz,  $\text{CDCl}_3$ , ppm)  $\delta$  8.21–8.17 (m, 1.1H), 8.11 (d,  $J = 4.0$  Hz, 1.5H), 7.99 (d,  $J = 8.0$  Hz, 1.4H), 7.54–7.50 (m, 3H), 7.35 (d,  $J = 8.0$  Hz, 2H), 2.63 (s, 3H), 2.47–2.42 2s (2.47 s, (major), 2.42 s, (minor), 3H); MS (EI)  $m/z$  (%) 277, 262, 158, 130 (100), 77 (**3I**), 277 (100), 262, 234, 206, 103 (**3I'**); HRMS calcd. for:  $\text{C}_{18}\text{H}_{16}\text{O}_2\text{N}$   $[\text{M}+\text{H}]^+$  278.11756, found 278.11719.

**(4-Methoxyphenyl)(4-methyl-2-phenyloxazol-5-yl)methanone (3m)**  
**and 1-(4-(4-methoxyphenyl)-2-phenyloxazol-5-yl)ethanone (3m')**

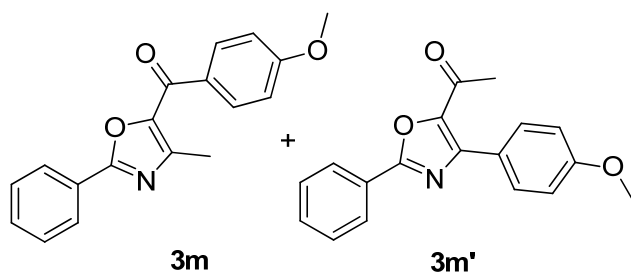

The reaction was conducted with benzamide (**1a**, 48.4 mg, 0.4 mmol), 1-(4-methoxyphenyl)butane-1,3-dione (**2e**, 38.4 mg, 0.2 mmol). The residue was purified by column chromatography (silica gel, petroleum ether/ethyl acetate = 85:15) to give **3m** and **3m'** as pale yellow solid; yield 76%. The ratio of the regioisomers was determined by GC (4:1).

$^1\text{H}$  NMR (400 MHz,  $\text{CDCl}_3$ , ppm)  $\delta$  8.34–8.32 (m, 0.4H), 8.19–8.11 (m, 3.8H), 7.61–7.45 (m, 3.1H), 7.04–7.02 (m, 1.7H), 3.92–3.87 2s (3.92 s, (major), 3.87 s, (minor), 3H), 2.63 (s, 3H); MS (EI)  $m/z$  (%) 293, 262, 158, 130 (100), 77 (**3m**), 293, 278, 250, 147 (100), 76 (**3m'**); HRMS calcd. for:  $\text{C}_{18}\text{H}_{16}\text{O}_3\text{N}$   $[\text{M}+\text{H}]^+$  294.11247, found 294.11215.



**(4-Fluorophenyl)(4-methyl-2-phenyloxazol-5-yl)methanone (3n)**

**and 1-(4-(4-fluorophenyl)-2-phenyloxazol-5-yl)ethanone (3n')**

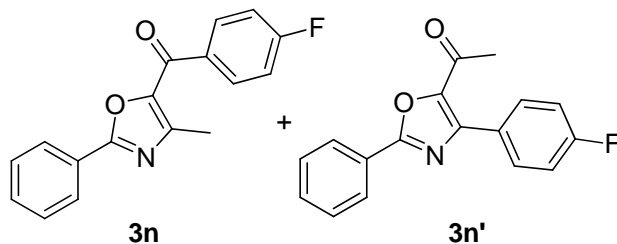

The reaction was conducted with benzamide (**1a**, 48.4 mg, 0.4 mmol) and 1-(4-fluorophenyl)butane-1,3-dione (**2f**, 36.0 mg, 0.2 mmol). The residue was purified by column chromatography (silica gel, petroleum ether/ethyl acetate = 93:7) to give **3n** and **3n'** as pale yellow solid; yield 66%. The ratio of the regioisomers was determined by GC (3:1).

<sup>1</sup>H NMR (400 MHz, CDCl<sub>3</sub>, ppm) δ 8.38-8.36 (m, 0.3H), 8.34-8.09 (m, 3.7H), 7.54-7.49(m, 3H), 7.24-7.13 (m, 2H), 2.65-2.64 2s (2.65 s, (minor), 2.64 s, (major), 3H); MS (EI) m/z (%) 281, 264, 158, 130 (100), 77 (**3n**), 281, 266, 238, 210, 107 (100) (**3n'**); HRMS calcd. for: C<sub>17</sub>H<sub>13</sub>O<sub>2</sub>NF [M+H]<sup>+</sup> 282.09248, found 282.09216.

**(4-Chlorophenyl)(4-methyl-2-phenyloxazol-5-yl)methanone (3o)**

**and 1-(4-(4-chlorophenyl)-2-phenyloxazol-5-yl)ethanone (3o')**

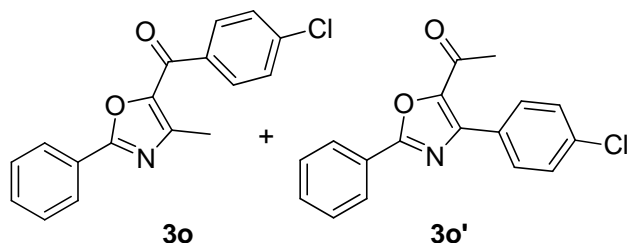

The reaction was conducted with benzamide (**1a**, 48.4 mg, 0.4 mmol) and 1-(4-chlorophenyl)butane-1,3-dione (**2g**, 39.2 mg, 0.2 mmol). The residue was purified by column chromatography (silica gel, petroleum ether/ethyl acetate =93:7) to give **3o** and **3o'** as pale yellow solid; yield 73%. The ratio of the regioisomers was determined by GC (4:1).

<sup>1</sup>H NMR (400 MHz, CDCl<sub>3</sub>, ppm) δ 8.31 (d, *J* = 8.0 Hz, 0.3H), 8.20-8.19 (m, 0.3H), 8.10 (d, *J* = 8.0 Hz, 1.5H), 8.03 (d, *J* = 12.0 Hz, 1.5H), 7.54-7.44 (m, 5.4H), 2.66-2.64 2s (2.66 s, (minor), 2.64 s, (major), 3H); MS (EI) m/z (%) 297, 262, 158, 130 (100), 77 (**3o**), 297, 262 (100), 226, 123, 77 (**3o'**); HRMS calcd. for: C<sub>17</sub>H<sub>13</sub>O<sub>2</sub>NCl [M+H]<sup>+</sup> 298.06293, found 298.06257.

**(4-Methyl-2-phenyloxazol-5-yl)(naphthalen-1-yl)methanone (3p)**

**and 1-(4-(naphthalen-1-yl)-2-phenyloxazol-5-yl)ethanone (3p')**

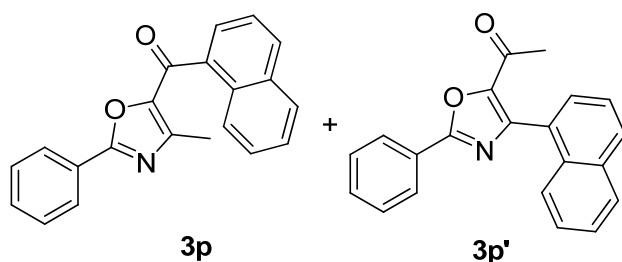

The reaction was conducted with benzamide (**1a**, 48.4 mg, 0.4 mmol) and 1-(naphthalen-1-yl)butane-1,3-dione (**2h**, 42.4 mg, 0.2 mmol). The residue was purified by column chromatography (silica gel, petroleum ether/ethyl acetate =93:7) to give **3p** and **3p'** as pale yellow solid; yield 75%. The ratio of the regioisomers was determined by GC (80:1).

<sup>1</sup>H NMR (400 MHz, CDCl<sub>3</sub>, ppm) δ 8.21-8.19 (m, 1H), 8.06-8.03 (m, 2H), 7.96-7.93 (m, 1H), 7.78 (d, *J* = 8.0 Hz, 1H), 7.60-7.44 (m, 7H), 2.39 (s, 3H); <sup>13</sup>C NMR (100 MHz, CDCl<sub>3</sub>, ppm) δ 184.7, 162.6, 149.1, 145.6, 135.7, 133.8, 131.8, 131.7, 130.5, 128.9, 128.5, 127.5, 127.4, 127.3, 126.6, 126.3, 125.2, 124.5, 14.3; MS (EI) *m/z* (%) 313, 285, 158, 130 (100), 77 (**3p**), 313, 298, 242, 139 (100), 77 (**3p'**); HRMS calcd. for: C<sub>21</sub>H<sub>16</sub>O<sub>2</sub>N [M+H]<sup>+</sup> 314.11756, found 314.11706.

**(4-Methyl-2-phenyloxazol-5-yl)(thiophen-2-yl)methanone (3q)**

**and 1-(2-phenyl-4-(thiophen-2-yl)oxazol-5-yl)ethanone (3q')**

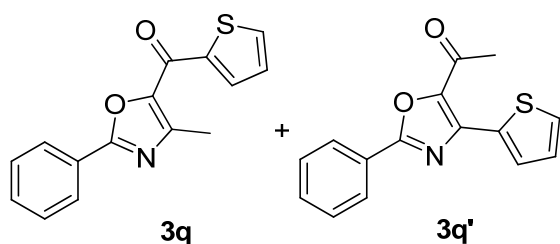

The reaction was conducted with benzamide (**1a**, 48.4 mg, 0.4 mmol) and 1-(thiophen-2-yl)butane-1,3-dione (**2i**, 33.6 mg, 0.2 mmol). The residue was purified by column chromatography (silica gel, petroleum ether/ethyl acetate =20:1) to give **3q** and **3q'** as pale yellow solid; yield 77%. The ratio of the regioisomers was determined by GC (8:1).

<sup>1</sup>H NMR (400 MHz, CDCl<sub>3</sub>, ppm) δ 8.50-8.49 (m, 0.1H), 8.25-8.24 (m, 0.9H), 8.17-8.15 (m, 2H), 7.765 (d, *J* = 8.0 Hz, 1H), 7.54-7.53 (m, 3.3H), 7.26-7.25 (m, 0.6H), 7.18-7.16 (m, 0.1H), 2.67-2.66 2s (2.67 s, (minor), 2.66 s, (major), 3H); MS (EI) *m/z* (%) 269, 252, 158, 130 (100), 77

(**3q**), 269, 222, 207, 123 (100), 77 (**3q'**); HRMS calcd. for: C<sub>15</sub>H<sub>12</sub>O<sub>2</sub>NS [M+H]<sup>+</sup> 270.05833, found 270.05795.

**(2-Chlorophenyl)(4-methyl-2-phenyloxazol-5-yl)methanone (3r)**

**and 1-(4-(2-chlorophenyl)-2-phenyloxazol-5-yl)ethanone (3r')**

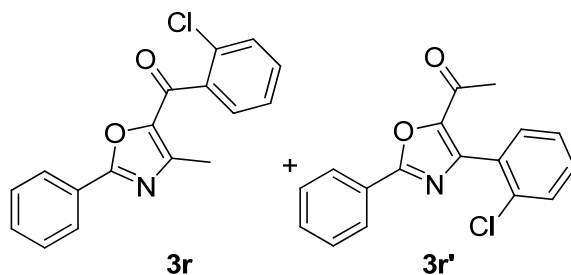

The reaction was conducted with benzamide (**1a**, 48.4 mg, 0.4 mmol) and benzenesulfonylhydrazine (**2a**, 51.6 mg, 0.3 mmol). The residue was purified by column chromatography (silica gel, petroleum ether/ethyl acetate =50:1) to give **3r** and **3r'** as pale yellow solid; yield 50%. The ratio of the regioisomers was determined by GC (4:1).

<sup>1</sup>H NMR (400 MHz, CDCl<sub>3</sub>, ppm) δ 8.21 (d, *J* = 8.0 Hz, 0.3H), 8.06 (d, *J* = 8.0 Hz, 1.3H), 7.56-7.39 (m, 7.4H), 2.42-2.39 2s, (2.42 s, (major), 2.39 s, (minor), 3H); MS (EI) m/z (%) 297, 262, 158, 130 (100), 77 (**3r**), 297, 262 (100), 226, 123, 77 (**3r'**); HRMS calcd. for: C<sub>17</sub>H<sub>13</sub>O<sub>2</sub>NCl [M+H]<sup>+</sup> 298.06293, found 298.06286.

**(E)-N-(4-Oxopent-2-en-2-yl)benzamide (4a)**

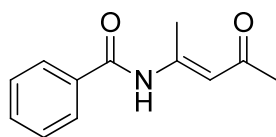

<sup>1</sup>H NMR (400 MHz, CDCl<sub>3</sub>, ppm) δ 13.39 (s, 1H), 8.03 (d, *J* = 8.0 Hz, 2H), 7.59-7.48 (m, 3H), 5.48 (s, 1H), 2.54 (s, 3H), 2.21 (s, 3H); <sup>13</sup>C NMR (100 MHz, CDCl<sub>3</sub>, ppm) δ 200.06, 166.01, 156.08, 133.65, 132.62, 128.88, 127.95, 106.16, 30.44, 22.00; MS (EI) m/z (%) 203, 185, 160, 105 (100), 77.

**Reference**

1. F. Berti, S. Bincoletto, I. Donati, G. Fontanive, M. Fregonese, F. Benedetti, *Org. Biomol. Chem.* **2011**, *9*, 1987.

# <sup>1</sup>H NMR and <sup>13</sup>C NMR spectra

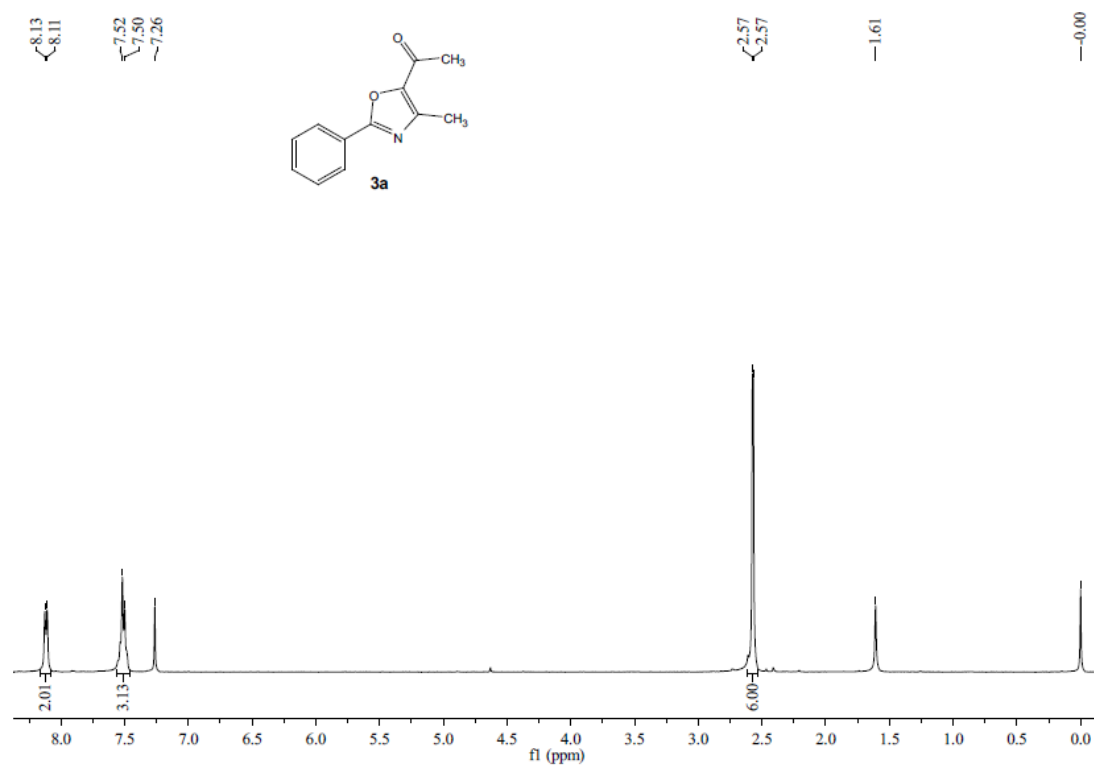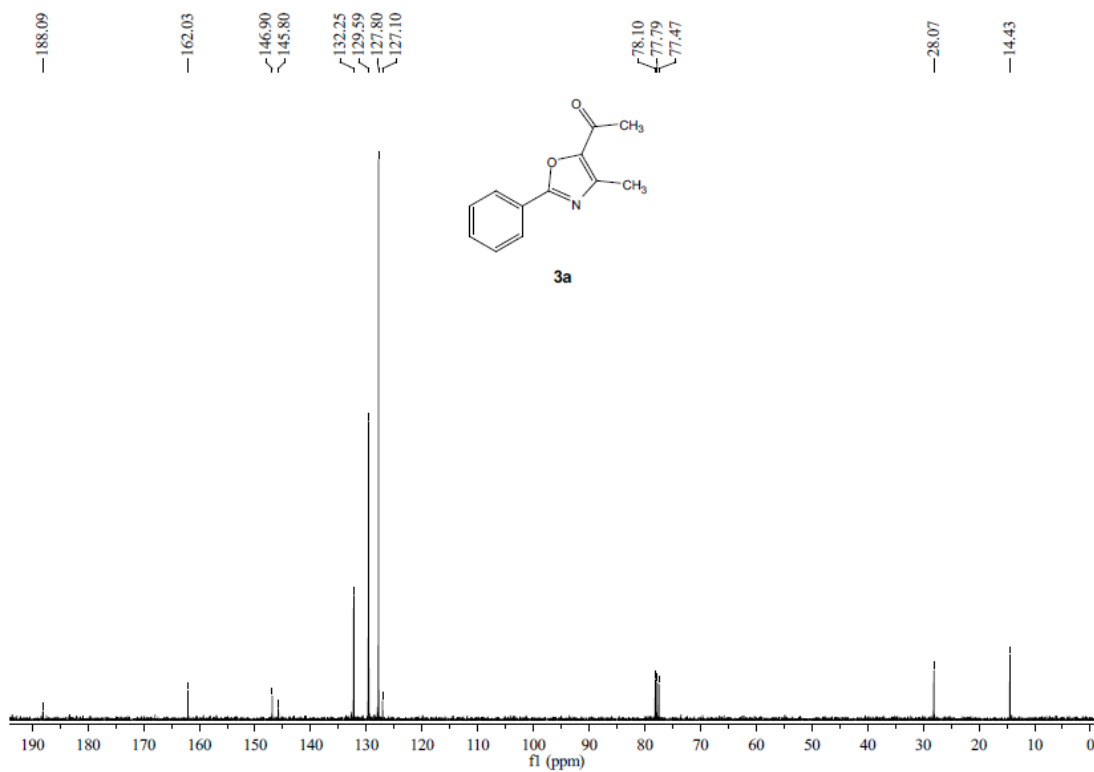

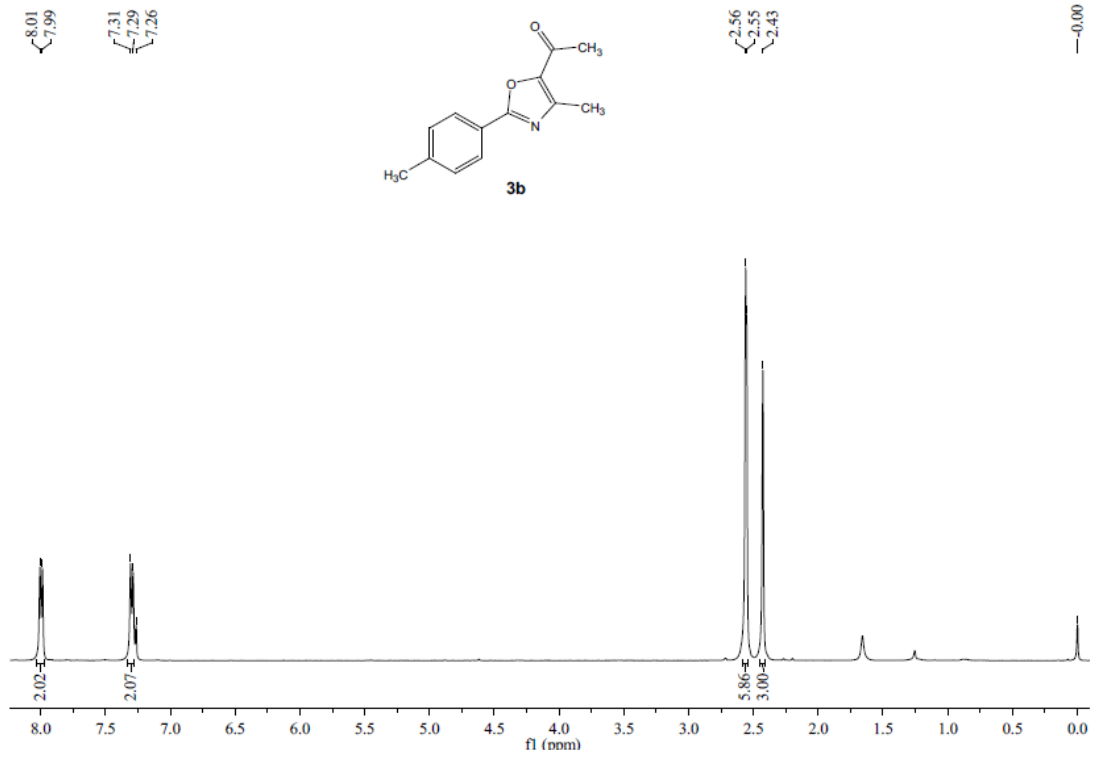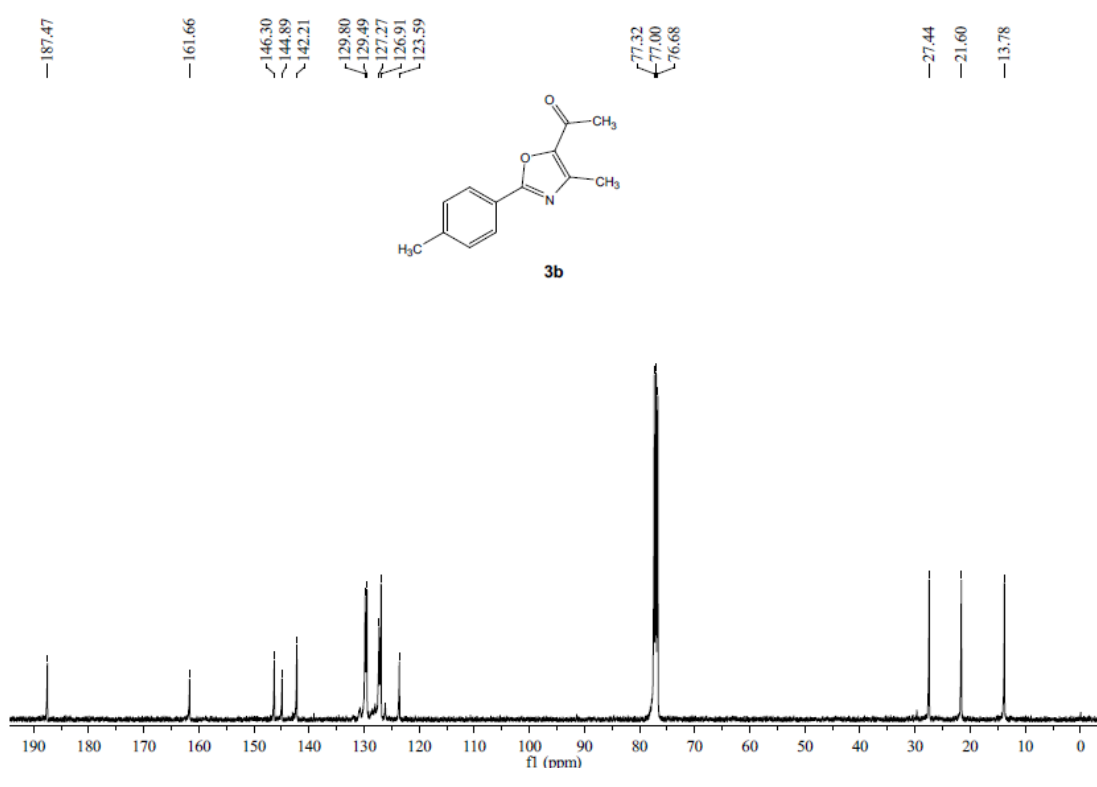

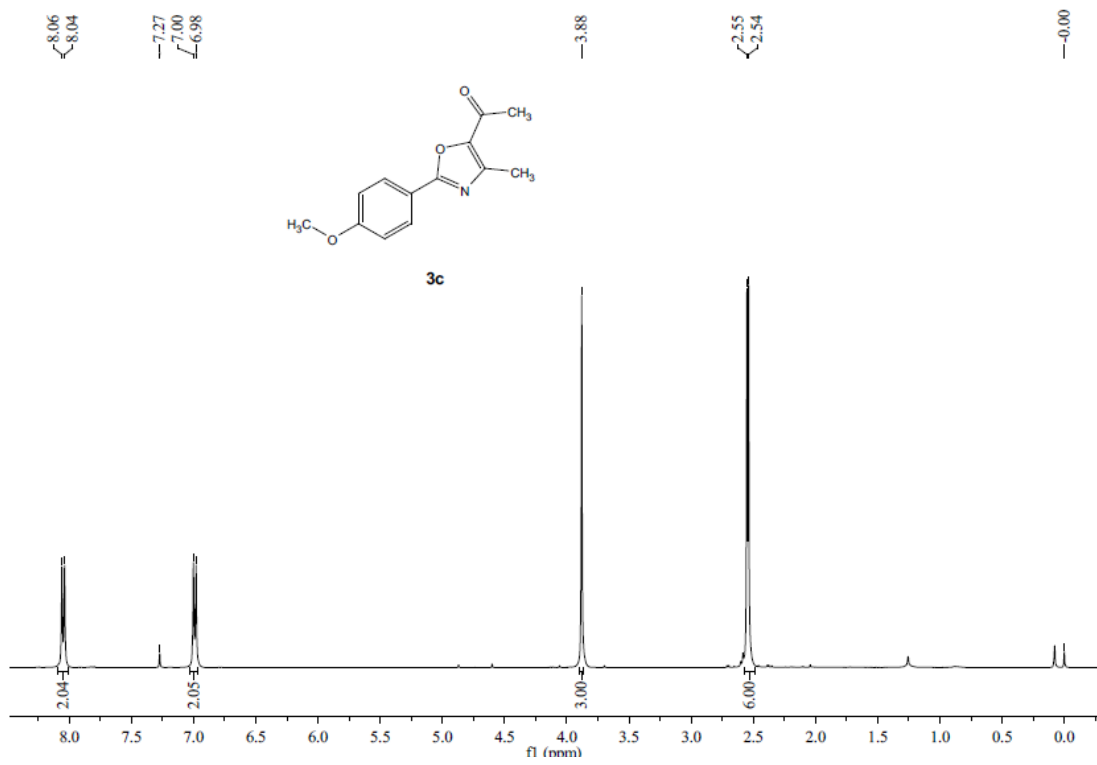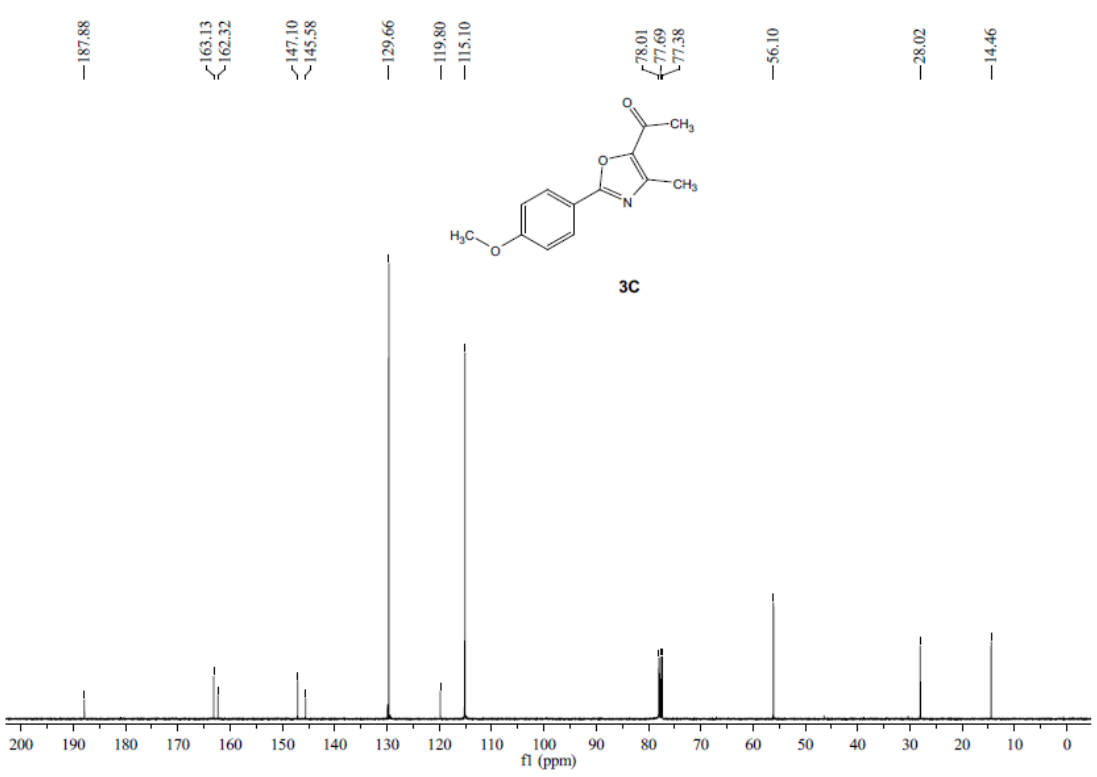

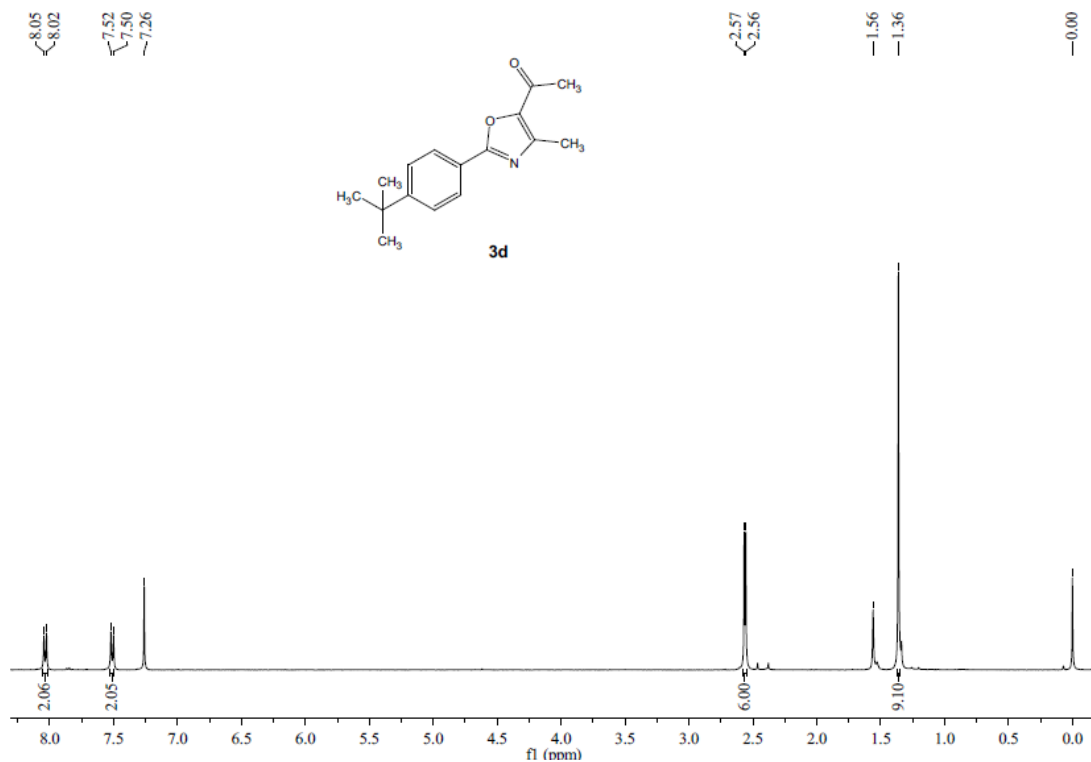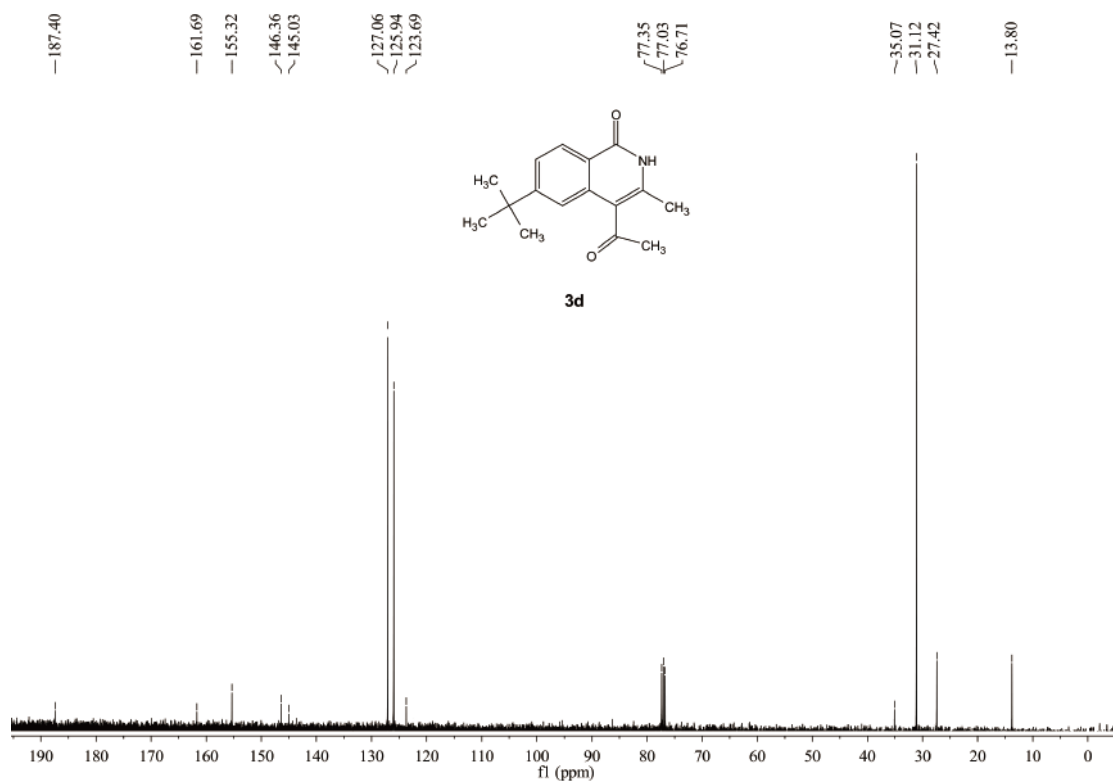

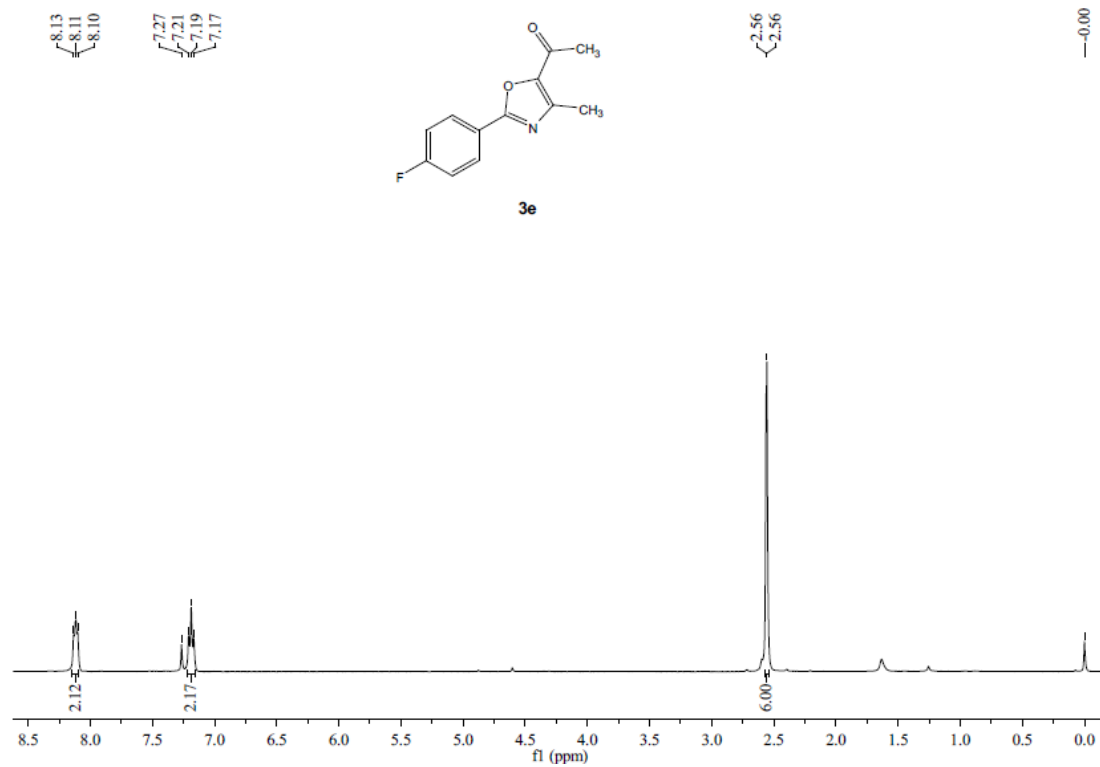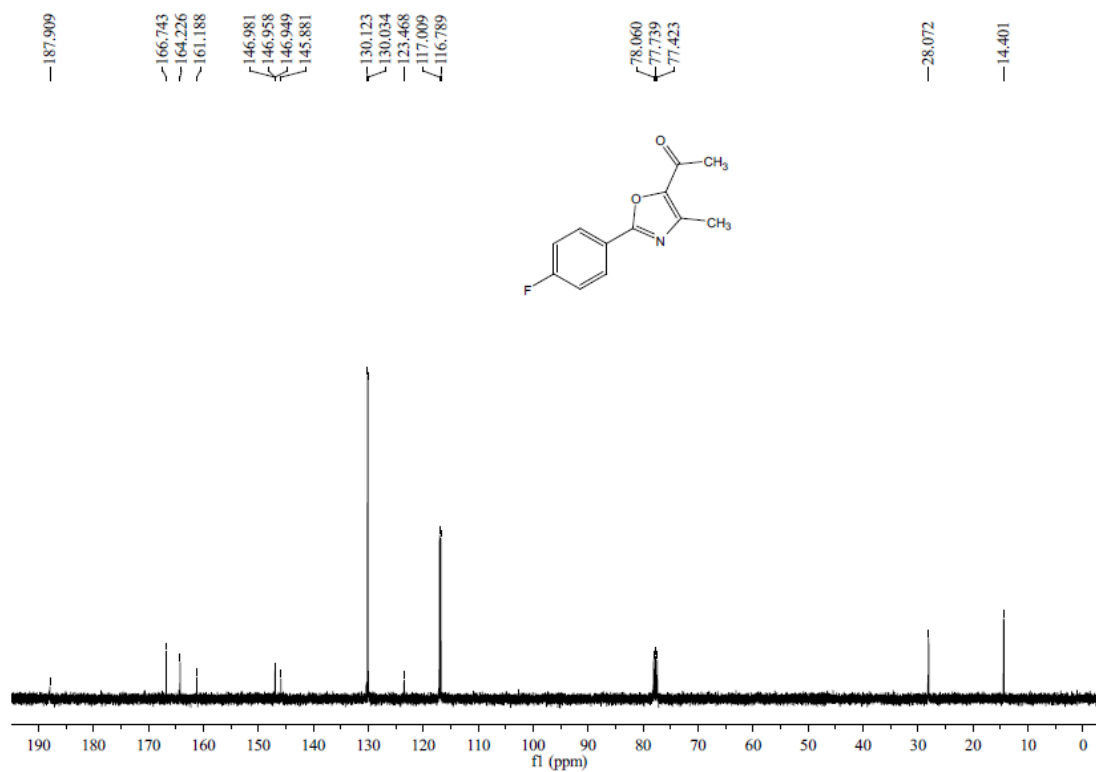



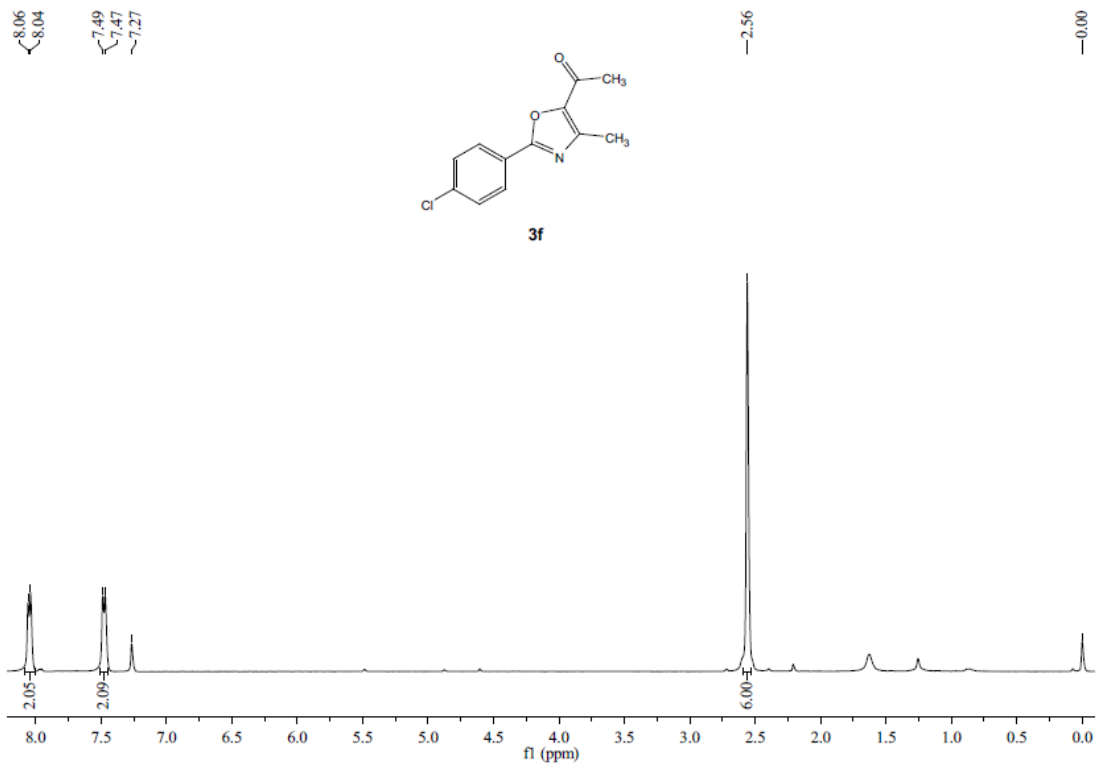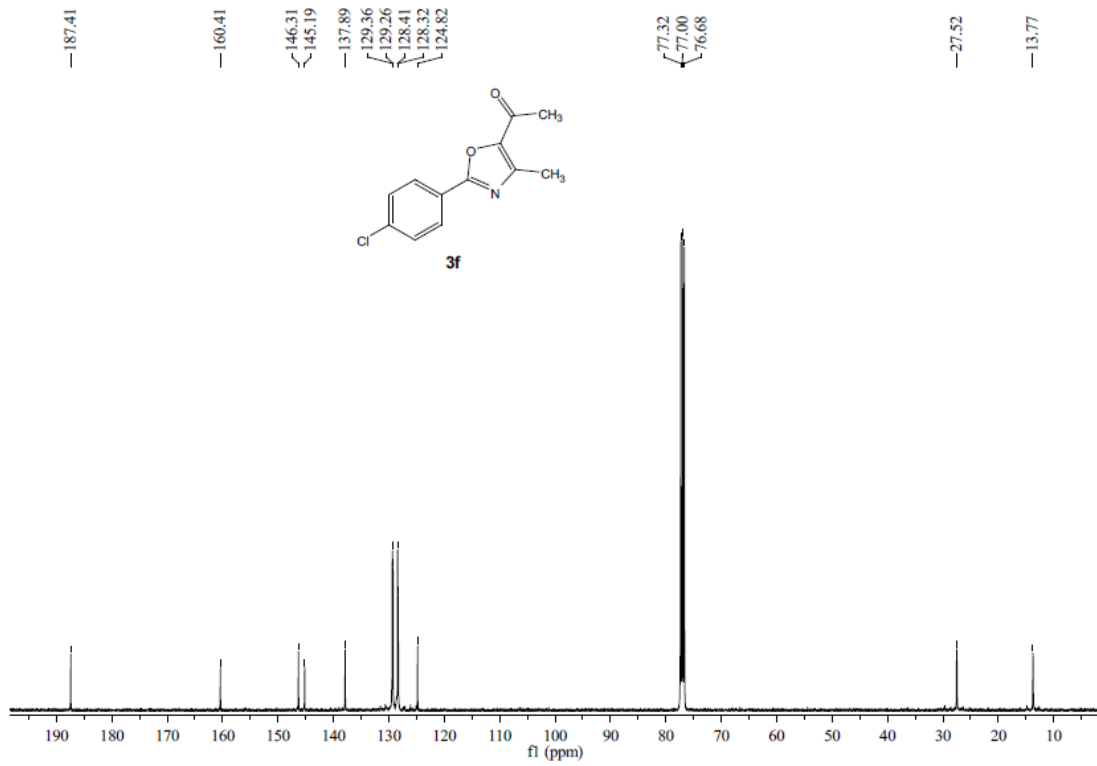

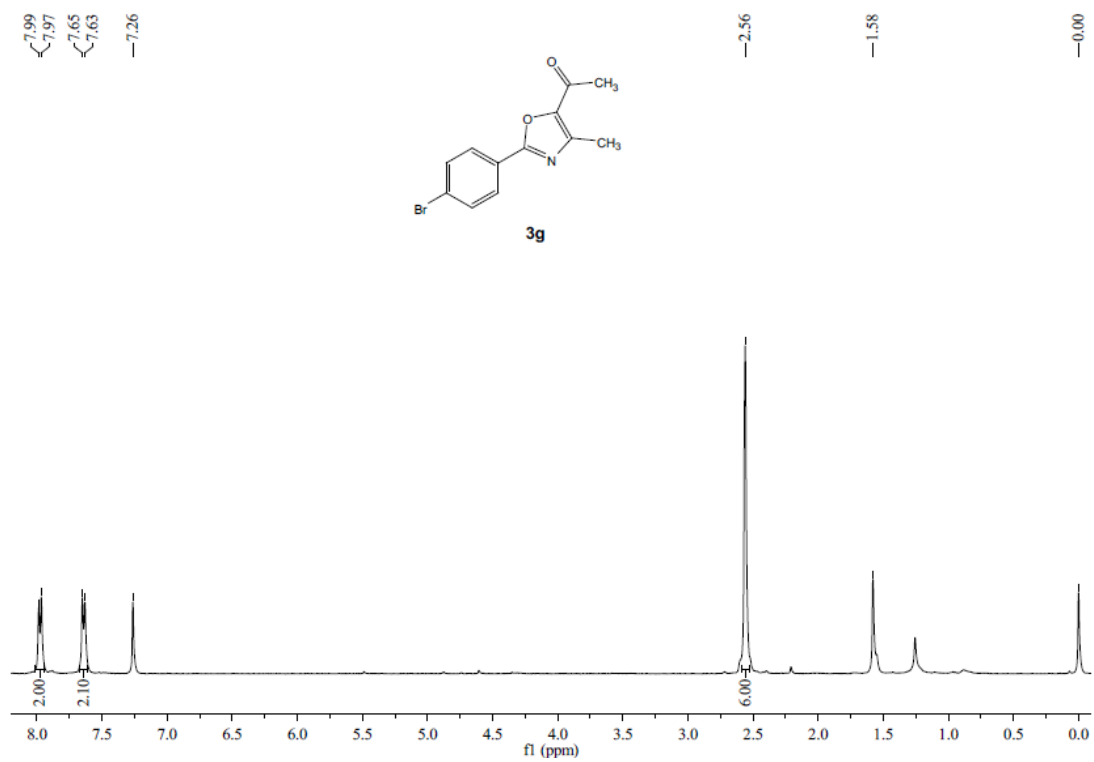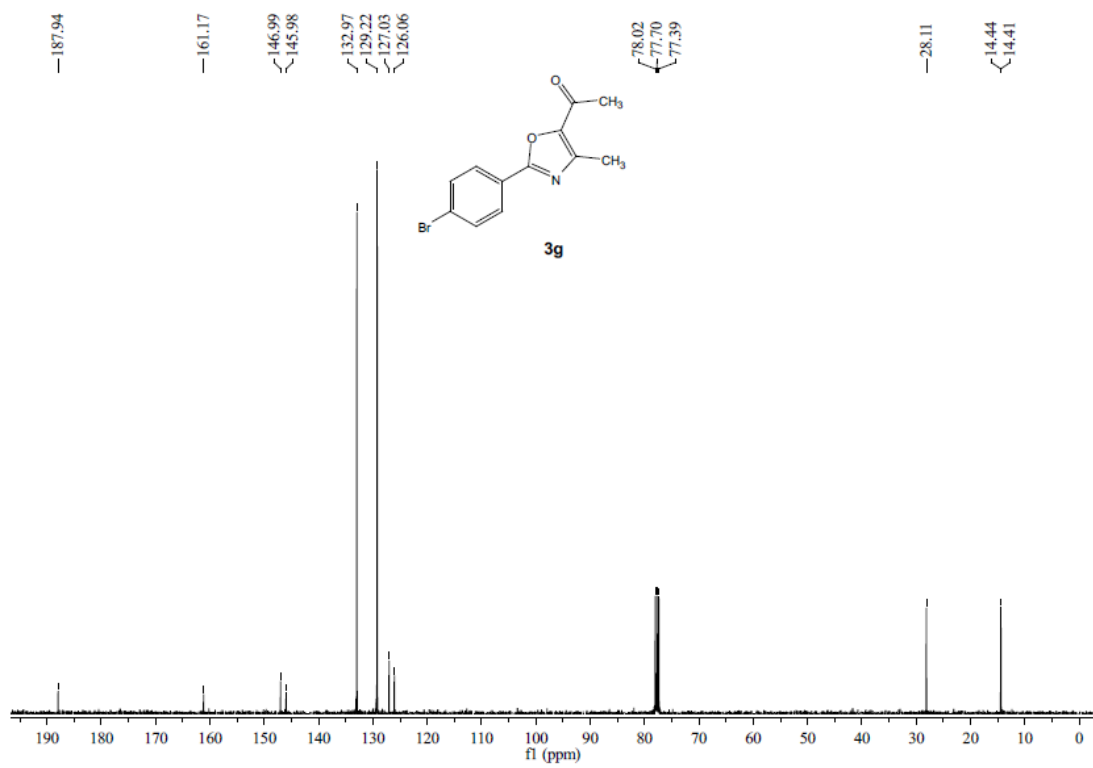

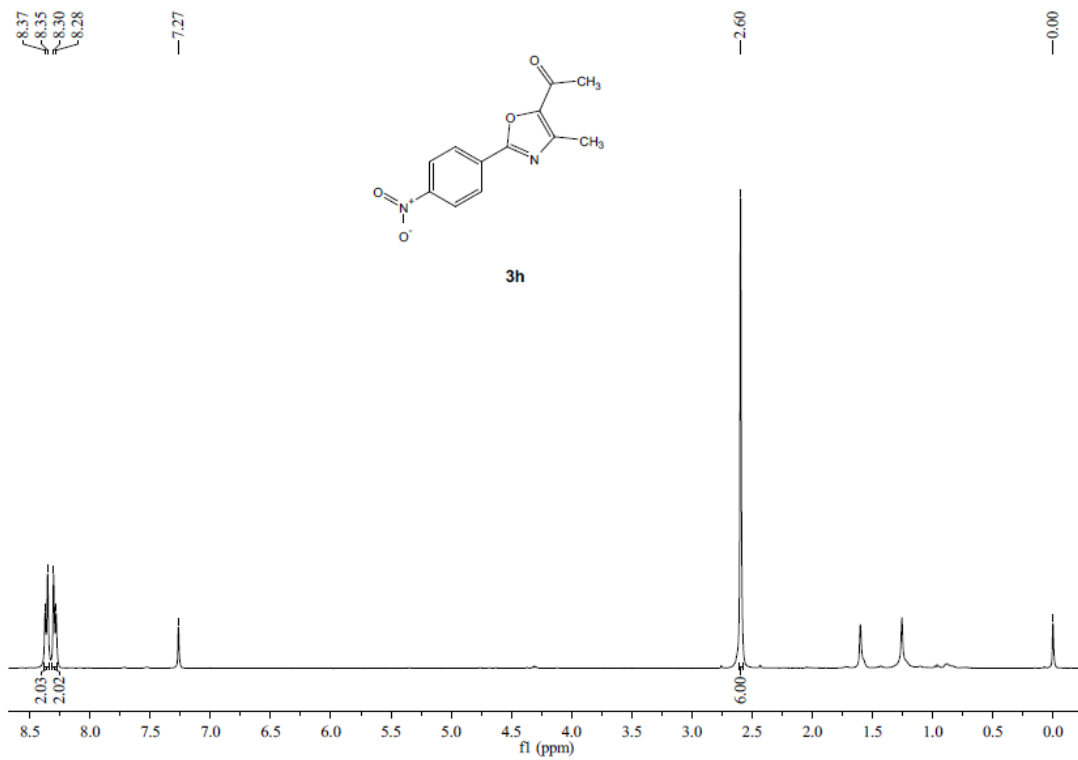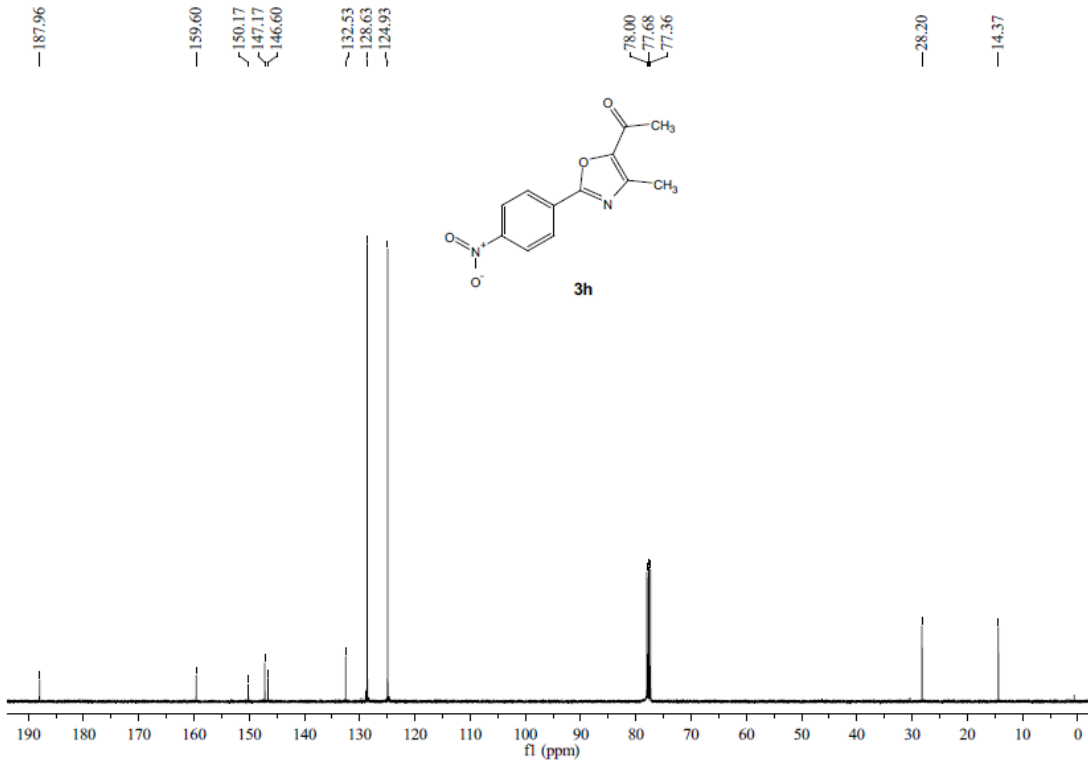

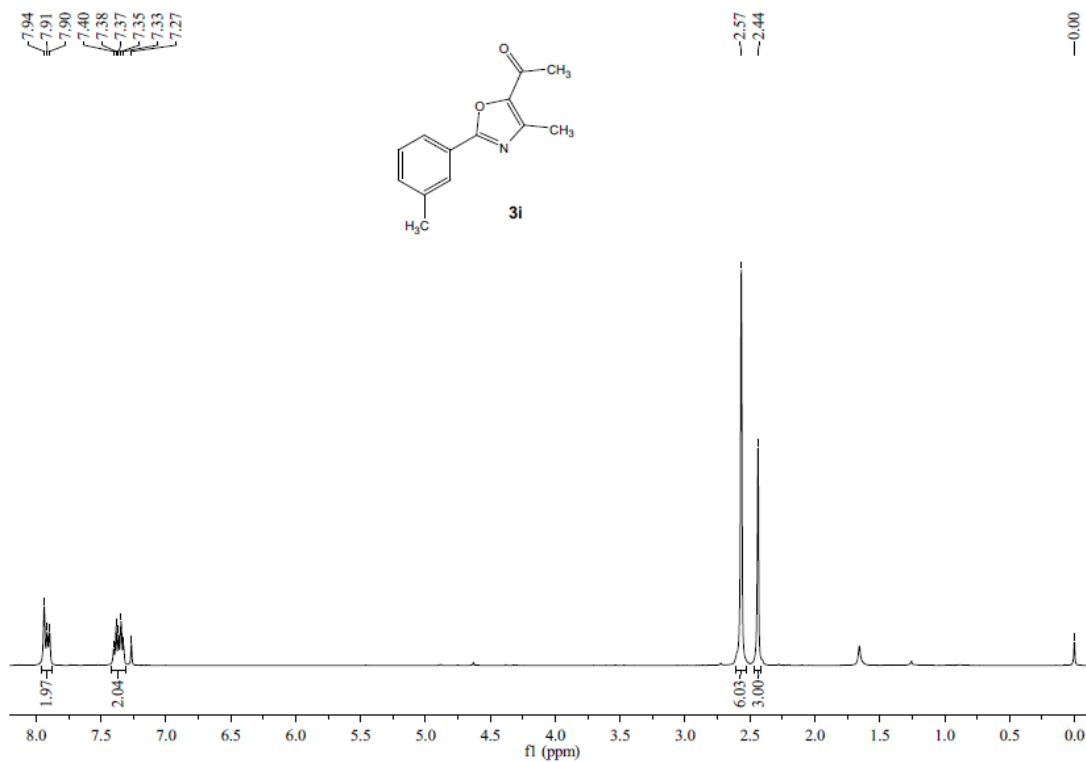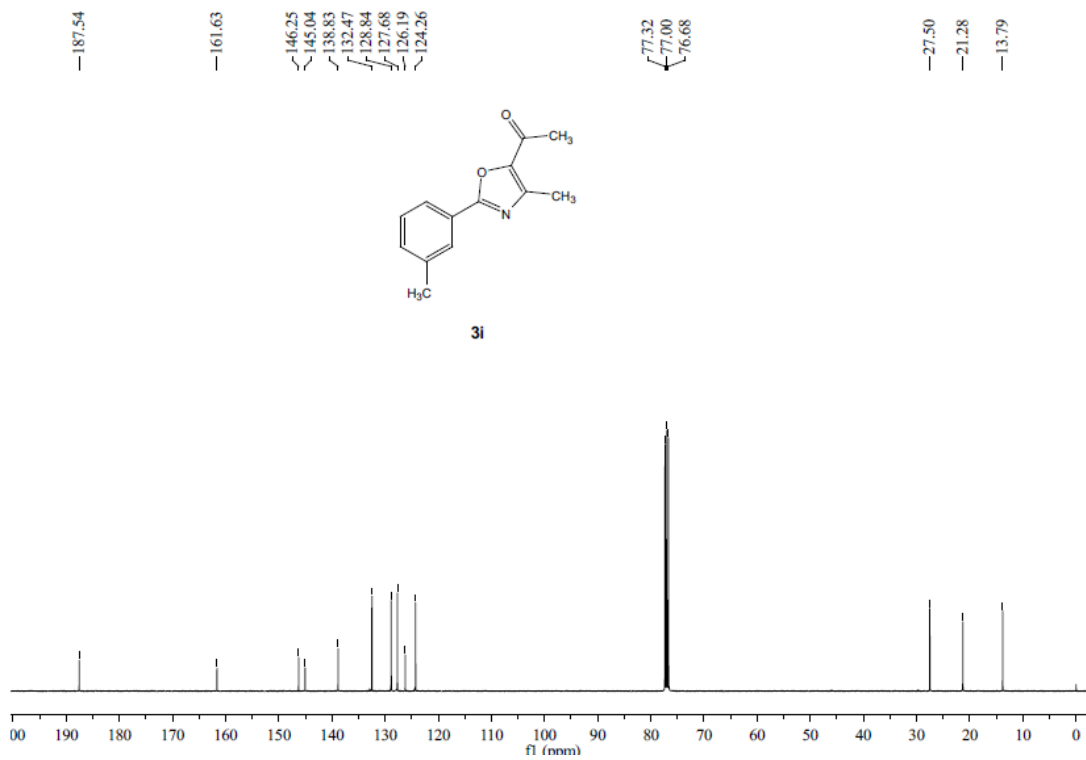

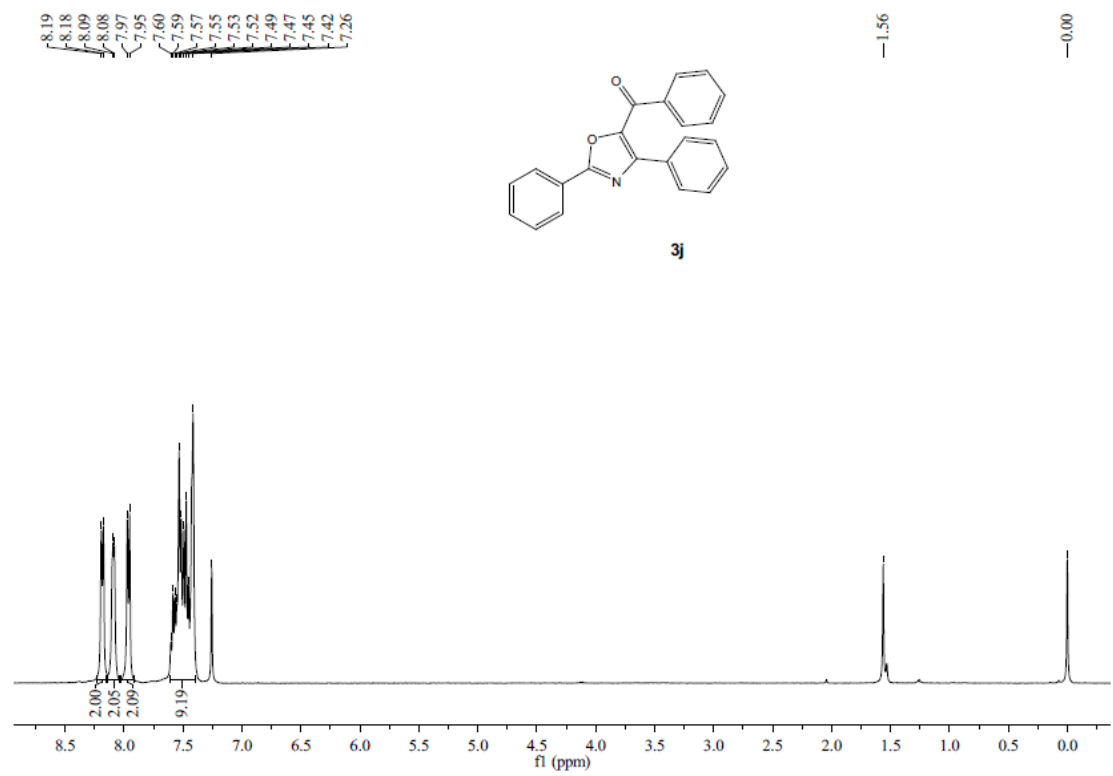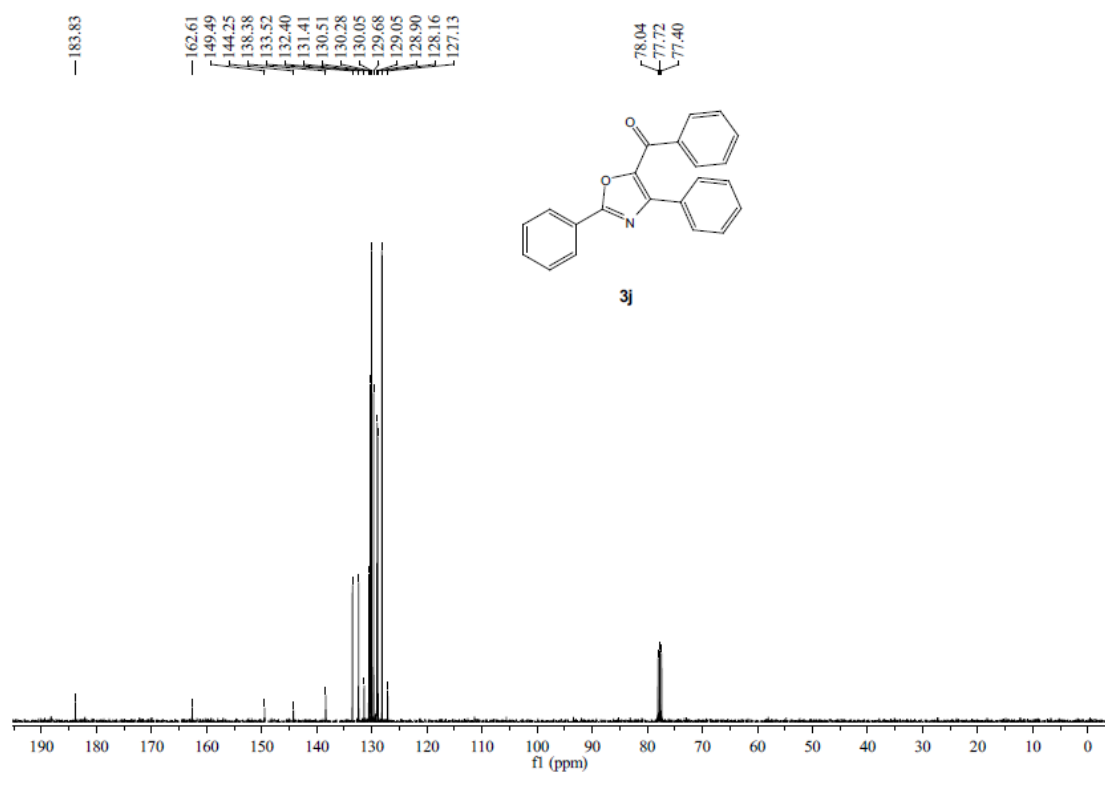

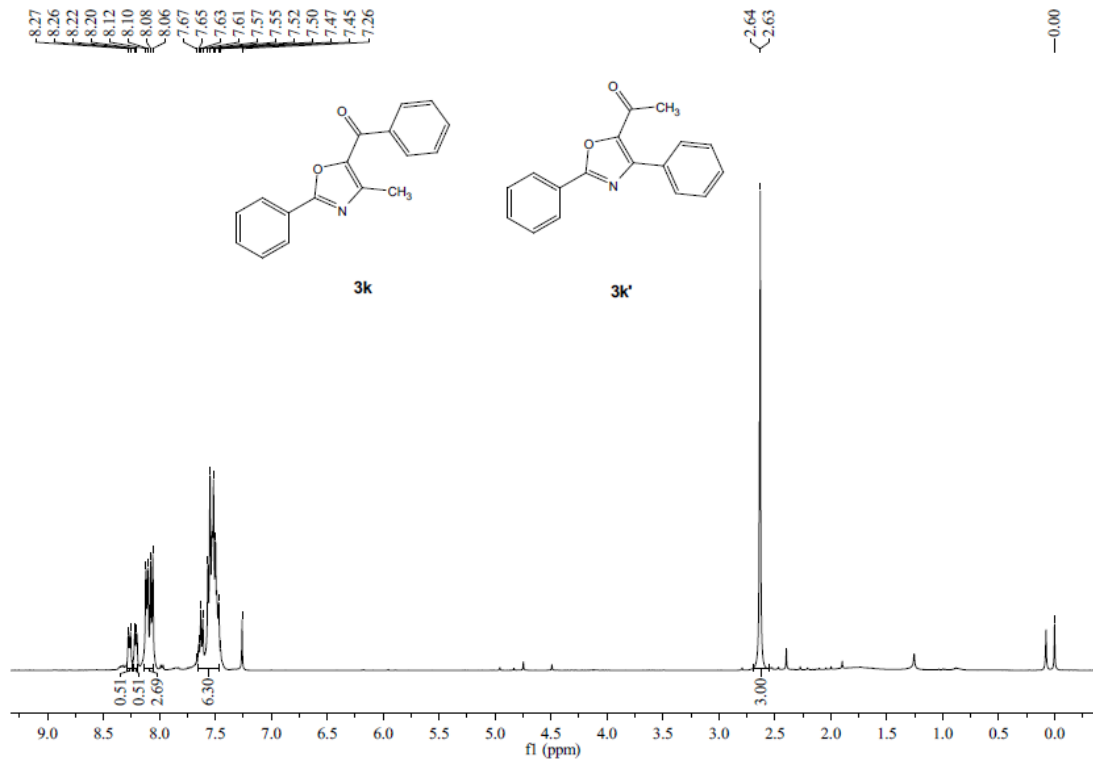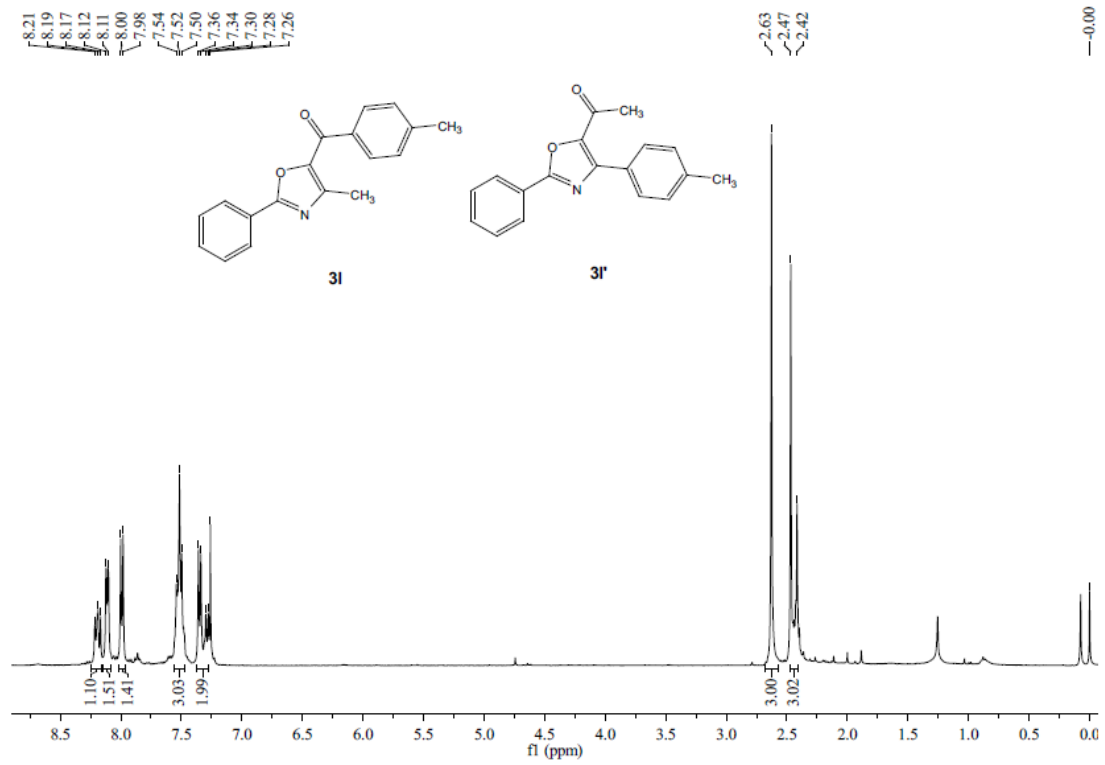

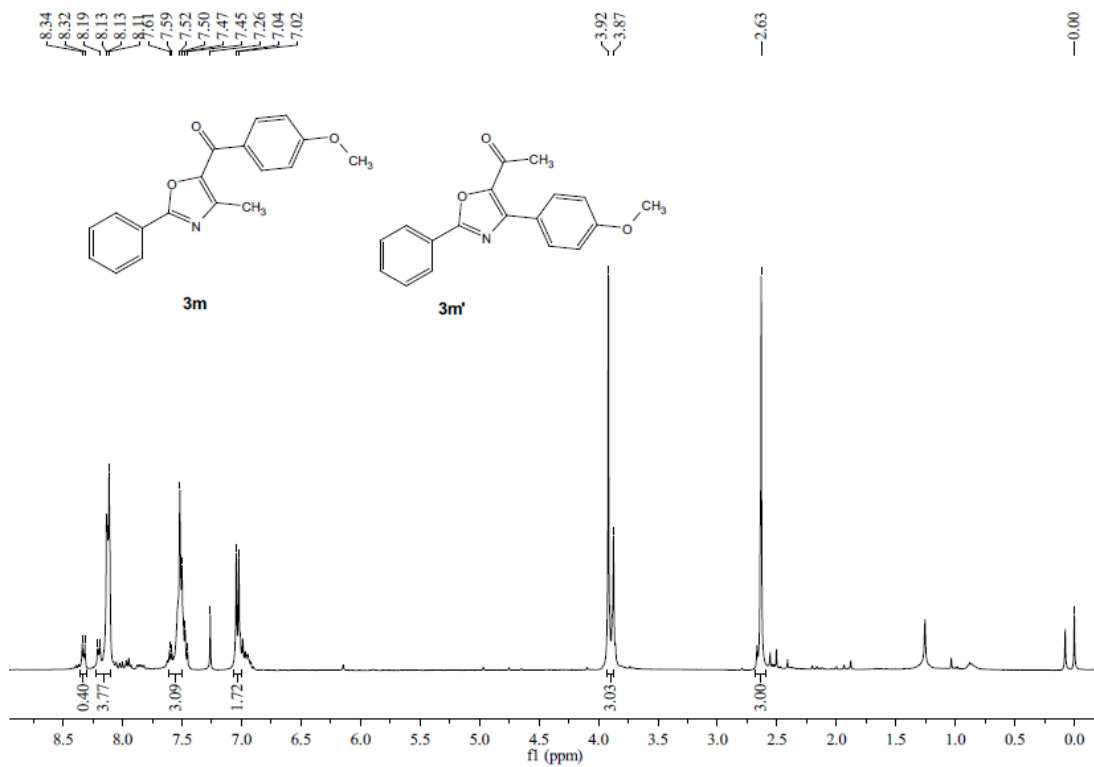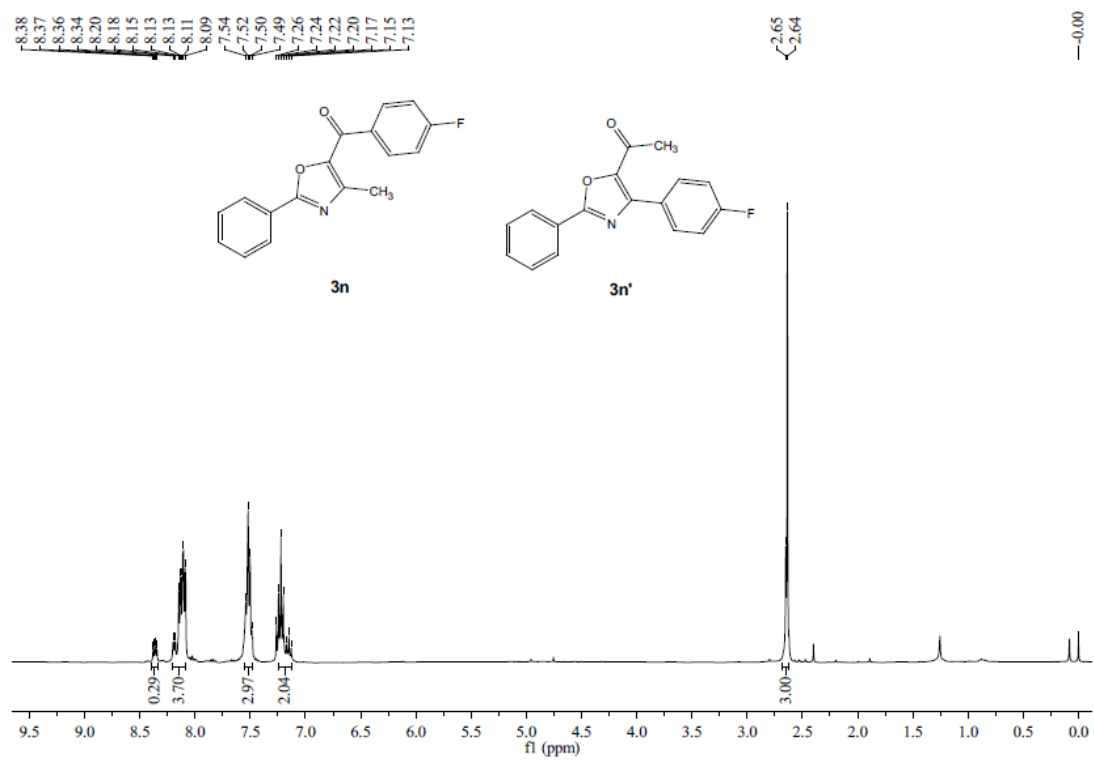

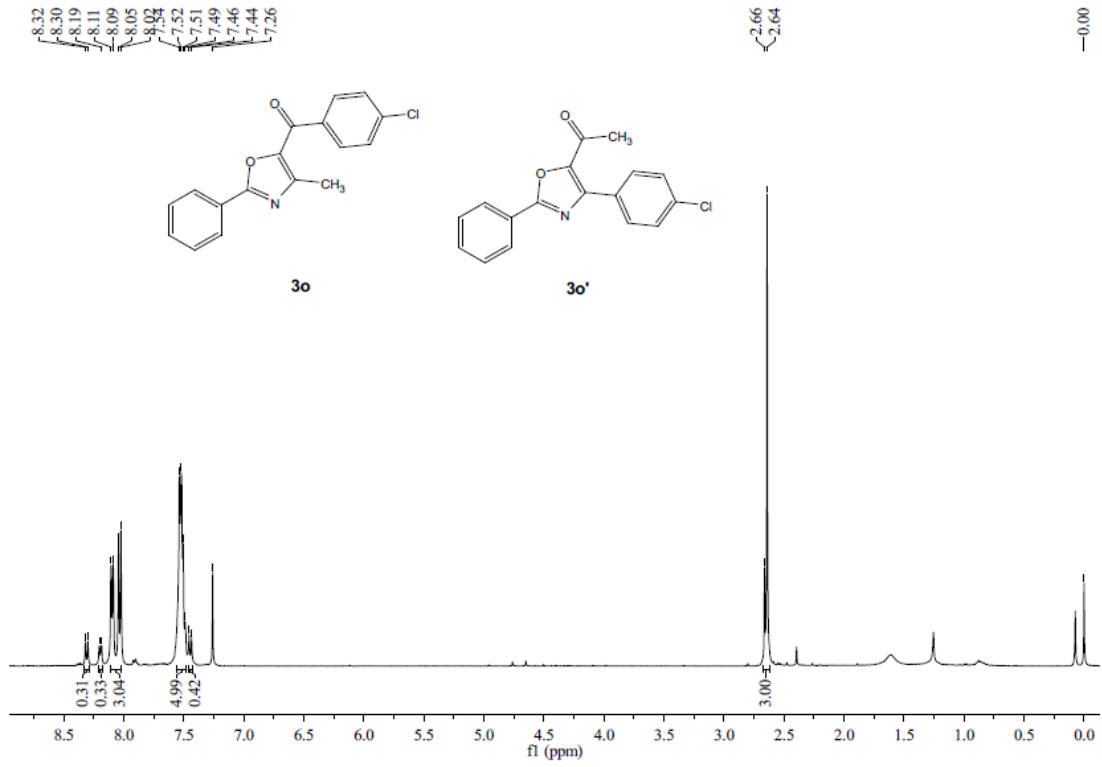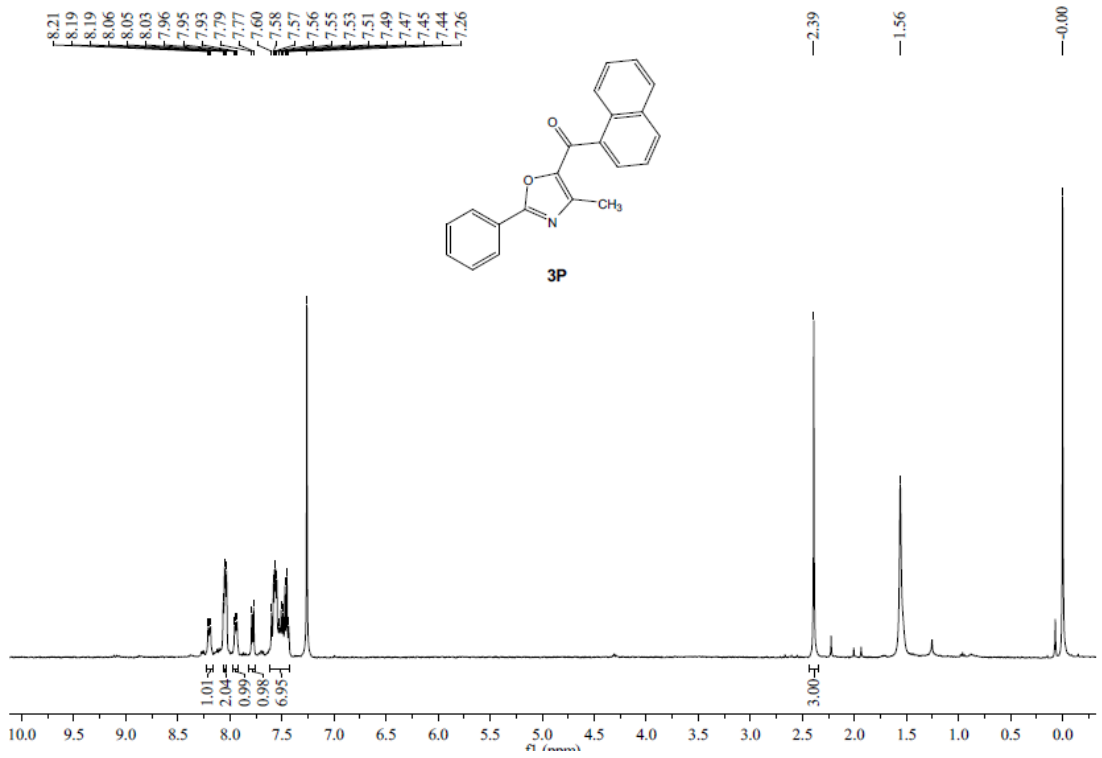



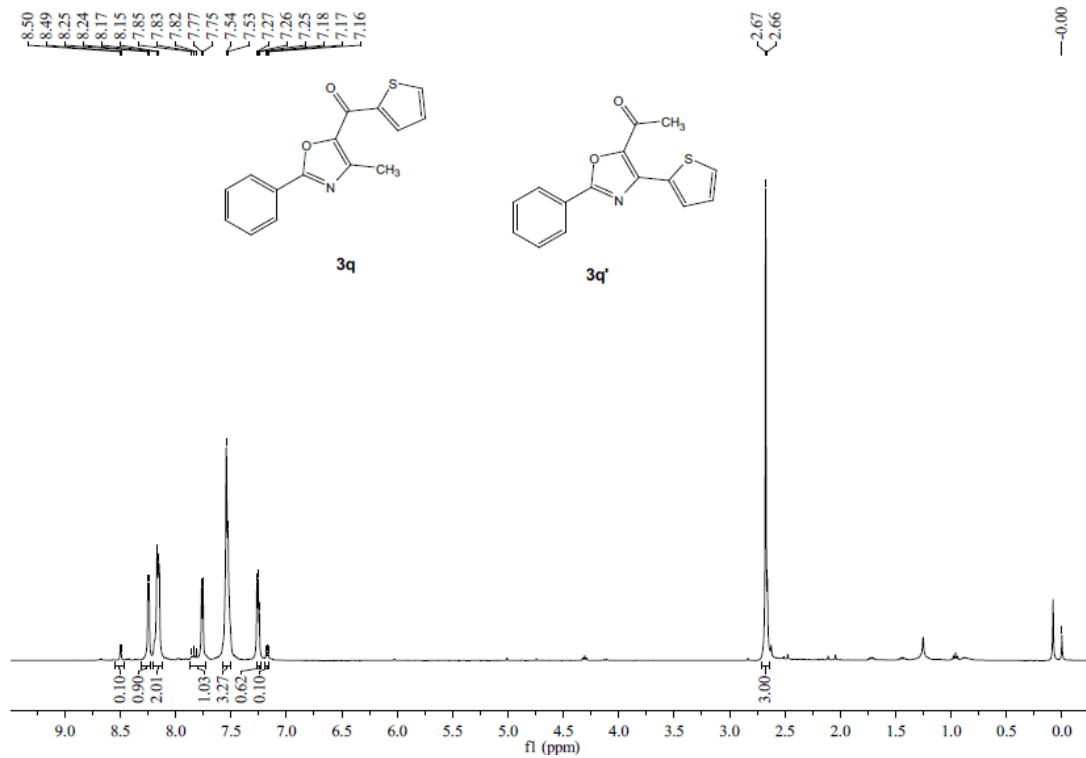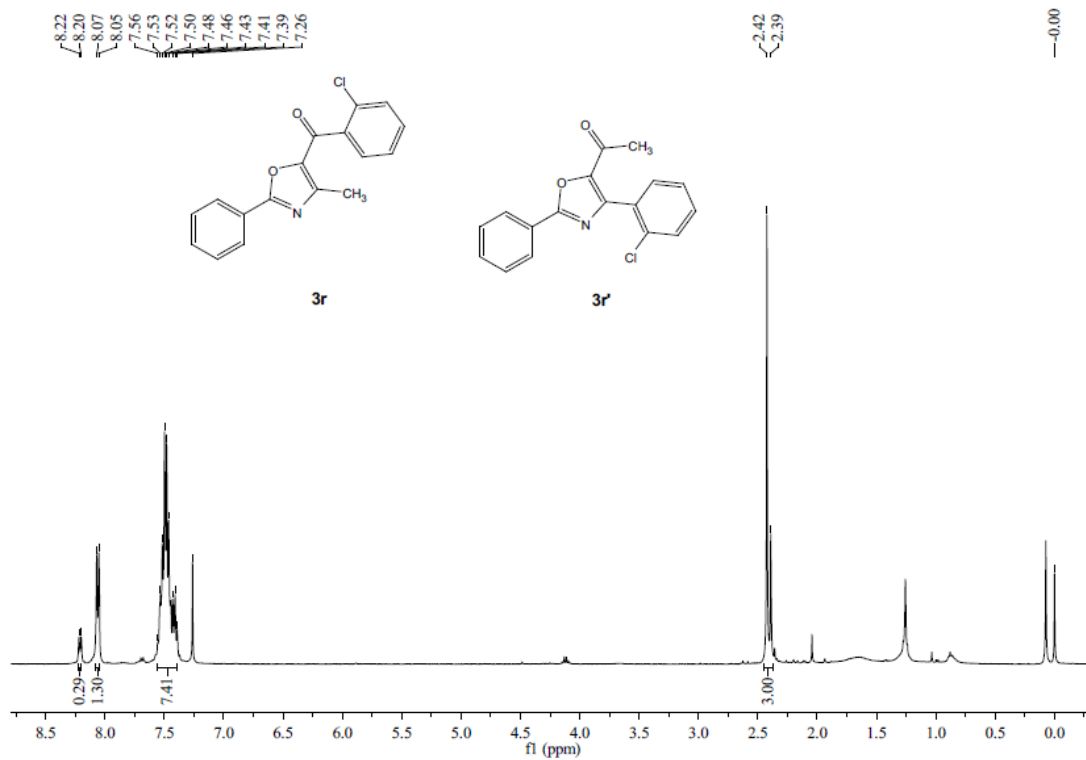

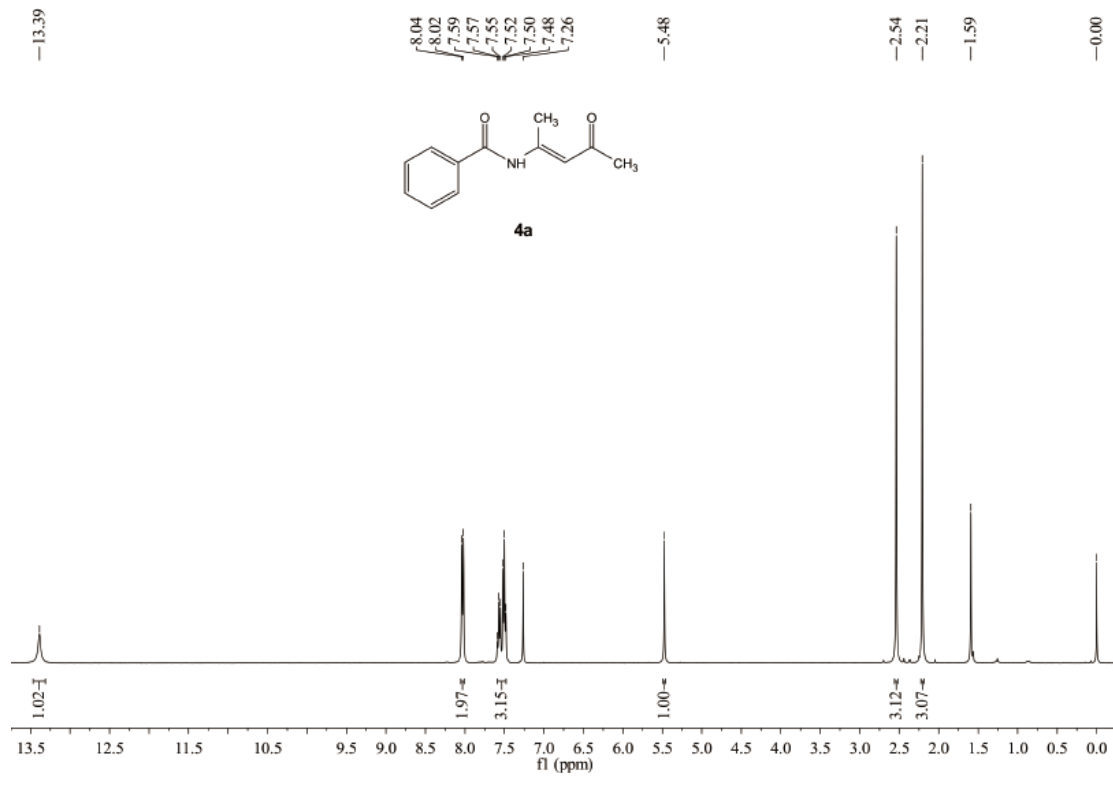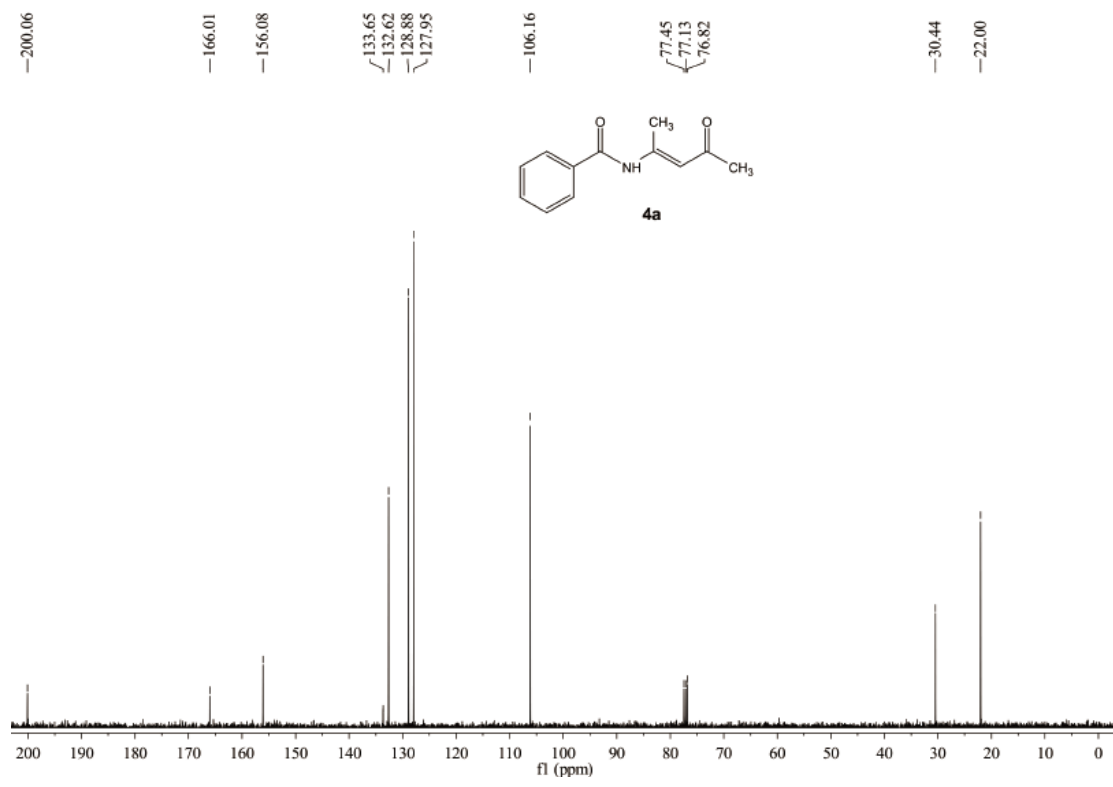

Supplement: c4ra14394a1.pdf [file c4ra14394a1.pdf]
